# Supplementary material for: Coenzyme Q10 supplementation for prophylaxis in adult patients with migraine—a meta-analysis
Source: PubMed Central journal article supplement — BMJ Open. 2021 Jan 5;11(1):e039358. doi: 10.1136/bmjopen-2020-039358 (PMC7786797; doi:10.1136/bmjopen-2020-039358), 2021-01-05
Supplement: bmjopen-2020-039358.draft_revisions.pdf [file bmjopen-2020-039358.draft_revisions.pdf]

# BMJ Open

BMJ Open is committed to open peer review. As part of this commitment we make the peer review history of every article we publish publicly available.

When an article is published we post the peer reviewers' comments and the authors' responses online. We also post the versions of the paper that were used during peer review. These are the versions that the peer review comments apply to.

The versions of the paper that follow are the versions that were submitted during the peer review process. They are not the versions of record or the final published versions. They should not be cited or distributed as the published version of this manuscript.

BMJ Open is an open access journal and the full, final, typeset and author-corrected version of record of the manuscript is available on our site with no access controls, subscription charges or pay-per-view fees (<http://bmjopen.bmj.com>).

If you have any questions on BMJ Open's open peer review process please email [info.bmjopen@bmj.com](mailto:info.bmjopen@bmj.com)

# BMJ Open

## COENZYME Q10 SUPPLEMENTATION FOR PROPHYLAXIS IN ADULT PATIENTS WITH MIGRAINE –A META-ANALYSIS

|                               |                                                                                                                                                                                                                                                                                                                                                                                                        |
|-------------------------------|--------------------------------------------------------------------------------------------------------------------------------------------------------------------------------------------------------------------------------------------------------------------------------------------------------------------------------------------------------------------------------------------------------|
| Journal:                      | <i>BMJ Open</i>                                                                                                                                                                                                                                                                                                                                                                                        |
| Manuscript ID                 | bmjopen-2020-039358                                                                                                                                                                                                                                                                                                                                                                                    |
| Article Type:                 | Original research                                                                                                                                                                                                                                                                                                                                                                                      |
| Date Submitted by the Author: | 14-Apr-2020                                                                                                                                                                                                                                                                                                                                                                                            |
| Complete List of Authors:     | Sazali, Suhairul; Universiti Sains Malaysia - Kampus Kesihatan, Department of Family Medicine<br>Badrin, Salziyan; Universiti Sains Malaysia - Kampus Kesihatan, Department of Family Medicine<br>Norhayati, Mohd Noor; Universiti Sains Malaysia - Kampus Kesihatan, Department of Family Medicine<br>Idris, Nur Suhaila; Universiti Sains Malaysia - Kampus Kesihatan, Department of Family Medicine |
| Keywords:                     | Migraine < NEUROLOGY, COMPLEMENTARY MEDICINE, Neurology < INTERNAL MEDICINE                                                                                                                                                                                                                                                                                                                            |
|                               |                                                                                                                                                                                                                                                                                                                                                                                                        |

SCHOLARONE™  
Manuscripts

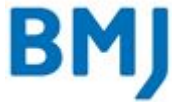

I, the Submitting Author has the right to grant and does grant on behalf of all authors of the Work (as defined in the below author licence), an exclusive licence and/or a non-exclusive licence for contributions from authors who are: i) UK Crown employees; ii) where BMJ has agreed a CC-BY licence shall apply, and/or iii) in accordance with the terms applicable for US Federal Government officers or employees acting as part of their official duties; on a worldwide, perpetual, irrevocable, royalty-free basis to BMJ Publishing Group Ltd ("BMJ") its licensees and where the relevant Journal is co-owned by BMJ to the co-owners of the Journal, to publish the Work in this journal and any other BMJ products and to exploit all rights, as set out in our [licence](#).

The Submitting Author accepts and understands that any supply made under these terms is made by BMJ to the Submitting Author unless you are acting as an employee on behalf of your employer or a postgraduate student of an affiliated institution which is paying any applicable article publishing charge ("APC") for Open Access articles. Where the Submitting Author wishes to make the Work available on an Open Access basis (and intends to pay the relevant APC), the terms of reuse of such Open Access shall be governed by a Creative Commons licence – details of these licences and which [Creative Commons](#) licence will apply to this Work are set out in our licence referred to above.

Other than as permitted in any relevant BMJ Author's Self Archiving Policies, I confirm this Work has not been accepted for publication elsewhere, is not being considered for publication elsewhere and does not duplicate material already published. I confirm all authors consent to publication of this Work and authorise the granting of this licence.

**Title page****Title: COENZYME Q10 SUPPLEMENTATION FOR PROPHYLAXIS IN ADULT PATIENTS WITH MIGRAINE –A META-ANALYSIS**

Suhairul Sazali<sup>1</sup>, Salziyan Badrin<sup>1</sup>, Norhayati Mohd Noor<sup>1</sup>, Nur Suhaila Idris<sup>1</sup>

**Authors:**

1. Suhairul Sazali  
MD  
Department of Family Medicine  
School of Medical Sciences  
Universiti Sains Malaysia  
16150 Kubang Kerian  
Kelantan, Malaysia  
Email: [suhairul\\_sazali@yahoo.com](mailto:suhairul_sazali@yahoo.com)
2. Salziyan Badrin (**Corresponding author**)  
MD, MMed (Family Medicine)  
Department of Family Medicine  
School of Medical Sciences  
Universiti Sains Malaysia  
16150 Kubang Kerian  
Kelantan, Malaysia  
Email: [salziyan@usm.my](mailto:salziyan@usm.my)  
Telephone number: +609-7676608  
Fax number: +609-7653370
3. Norhayati Mohd Noor  
MBBS, M.Comm.Med, Ph.D  
Department of Family Medicine  
School of Medical Sciences  
Universiti Sains Malaysia  
16150 Kubang Kerian  
Kelantan, Malaysia  
Email: [hayatikk@usm.my](mailto:hayatikk@usm.my)
4. Nur Suhaila Idris  
MD, MMed (Family Medicine)  
Department of Family Medicine  
School of Medical Sciences  
Universiti Sains Malaysia  
16150 Kubang Kerian  
Kelantan, Malaysia  
Email: [nursuhaila@usm.my](mailto:nursuhaila@usm.my)

1  
2  
3 **Keyword:** Coenzyme Q10, Migraine, Supplementation  
4

5 **Word count:** 3058 with exclusion of abstract, table, figures and references  
6  
7  
8  
9  
10  
11  
12  
13  
14  
15  
16  
17  
18  
19  
20  
21  
22  
23  
24  
25  
26  
27  
28  
29  
30  
31  
32  
33  
34  
35  
36  
37  
38  
39  
40  
41  
42  
43  
44  
45  
46  
47  
48  
49  
50  
51  
52  
53  
54  
55  
56  
57  
58  
59  
60

For peer review only

## Abstract

**Objective** To determine the effects of coenzyme Q10 (CoQ10) supplementation for migraine prophylaxis in adult patients.

**Design** Systematic review and meta- analysis.

**Data sources** Cochrane Central Register of Controlled Trials CENTRAL and MEDLINE (1966 to present) were reviewed and last updated until 23<sup>rd</sup> April 2019.

**Study selection** All blinded and open-label randomized control trials (RCTs) comparing CoQ10 with placebo or used as an adjunct treatment included in this meta-analysis. Cross-over designs and controlled clinical trials (CCT) were excluded. Eligibility of the study trials, data extraction and study quality were assessed by three authors independently.

**Data synthesis** Heterogeneity at face value by comparing populations, settings, interventions and outcomes were measured and statistical heterogeneity were assessed by means of the  $I^2$  statistic. The treatment effect for dichotomous outcomes were using risk ratios (RRs) and risk difference (RD), and for continuous outcomes, mean differences (MDs) or standardized mean difference (SMD); both with 95% confidence intervals (CIs) were used. Subgroup analyses were carried out for CoQ10 dosage. Sensitivity analysis was used to investigate the impact risk of bias for sequence generation and allocation concealment of included studies.

**Results** Six studies with a total of 723 participants were included in meta-analysis. There is no statistically significant reduction in severity of migraine headache with CoQ10 supplementation. CoQ10 supplementation reduced the duration of headache attacks compared to the control group (mean difference -0.19, 95% CI -0.27 to -0.11; random effects;  $I^2$  statistic = 0%;  $P < 0.00001$ ). CoQ10 usage reduced the frequency of migraine headache compared to the control group (MD -1.52, 95% CI -2.40 to -0.65; random effects;  $I^2$  statistic = 0%;  $P = <0.001$ ).

1  
2  
3 **Conclusion** CoQ10 appears to have beneficial effects in reducing duration and frequency of  
4  
5 migraine attack and may recommends for migraine prophylaxis.  
6  
7

8 **PROSPERO registration number** CRD42019126127; protocol  
9  
10  
11  
12  
13  
14  
15  
16  
17  
18  
19  
20  
21  
22  
23  
24  
25  
26  
27  
28  
29  
30  
31  
32  
33  
34  
35  
36  
37  
38  
39  
40  
41  
42  
43  
44  
45  
46  
47  
48  
49  
50  
51  
52  
53  
54  
55  
56  
57  
58  
59  
60

For peer review only

## Strengths and limitations of this study

### Strengths

- The meta-analysis only included randomized controlled trials
- The overall level of evidence was assessed using the GRADE approach
- This meta-analysis also provides the effects of coenzyme Q10 on secondary outcomes (number of days with nausea due to migraine headache, numbers of acute migraine medication usage, quality of life and adverse effects)

### Limitation

- Data on side effects of coenzyme Q10 are limited



## Introduction

Migraine is an episodic disorder, the centrepiece of which is a severe headache generally associated with nausea and/or light and sound sensitivity. Migraine is a common disorder that affects up to 12% of the general population(1). Migraine is a debilitating brain disorder with serious social and financial consequences for the individual and the society(2). Migraine medications usually aim to reduce the frequency and intensity of headache attacks and some of it acts as preventive medication. Headache attack frequency and frequency of acute migraine medication use often influence modification in migraine treatment(3).

Low levels of the micronutrients such as riboflavin, magnesium and coenzyme in plasma and in the brain are reported in migraine patients(4). A deficit of these nutrients is thought to cause the migraine attacks. The cortical spreading depression is hypothesized to cause the elevation level of MMP-9 is associated with blood-brain barrier dysfunction and inflammation of nerves exacerbates migraine attacks(5, 6). The CoQ10, also known as ubiquinone, is one of the most important antioxidants that acts against hydrogen peroxide and other inflammatory markers of migraine along with reduction of expression cytokines and MMPs(7). CoQ10 is a vitamin-like compound, which can be synthesized by the body from phenylalanine and tyrosine. It has many roles in the body especially in mitochondria and is thought to play a role in migraines but the link is unknown(4). It acts as an important factor in the electron transport chain of mitochondria, which helps in energy metabolism and oxygen utilization in the brain and muscles(8). CoQ10 can be administered orally or parenterally. Peak blood levels occur 5–10 hours after oral administration. Elimination half-life is 33.19 hours(9). This meta-analysis aimed to determine the effectiveness of CoQ10 supplements as a prophylaxis for migraine in adult patients. The protocol for this meta-analysis is registered in International Prospective Register of Systematic review (PROSPERO) with trial number CRD42019126127, available from <https://www.crd.york.ac.uk/prospere>.

## Methods

Only randomized control trials (RCTs) comparing CoQ10 with placebo or as an adjunct treatment were accepted. All blinded and open-label studies were included in this meta-analysis. Cross-over designs and controlled clinical trials (CCT) were excluded. Participants that were included in this study were adults aged 18 till 50 years old of either sex or of any ethnicity. Supplementation with oral CoQ10 as monotherapy or in combinations with other dietary products regardless in duration of therapy. Migraine were diagnosed by neurologist or physician according to either International Classification of Headache Disorder II (ICHD-II) or International Headache Society criteria (IHS). The primary outcomes and secondary outcomes were followed up for a minimum of 6 weeks after been given interventions.

### *Identification of study*

We searched the Cochrane Central Register of Controlled Trials CENTRAL (latest Issue), MEDLINE (1966 to present). We used the search strategy (refer to Supplementary file 1) to search in MEDLINE and CENTRAL. We checked the reference list of identified RCTs and review articles in order to find unpublished trials or trials not identified by electronic searches. We contacted the experts in the field and pharmaceutical companies which market CoQ10 to identify unpublished trials. We searched for ongoing trials through the World Health Organization (WHO) International Clinical Trials Registry Platform (ICTRP) <https://www.who.int/ictrp/en/> and [www.clinicaltrials.gov](http://www.clinicaltrials.gov). We excluded trials published other than English language. We scanned the titles and abstracts from the searches and obtain full-text articles when they appear to meet the eligibility criteria, or when there was insufficient information to assess the eligibility. We assessed the eligibility of the trials independently and documented all the reasons for exclusion. We resolved any disagreements between the review authors by discussion. We contacted the authors if clarification is needed.

### ***Data Collection and analysis***

Three authors extracted data independently. We extracted data on dosage and frequency of CoQ10 supplementation, criteria for diagnosis of migraine, age, sex, ethnicity, and outcomes of each trials which include severity of headache attack, duration of headache in migraine attack, frequency of migraine attack in a month, numbers of days with nausea, numbers of analgesic used during headache attack, numbers of acute migraine medication used, quality of life and adverse effects of CoQ10 using data extraction form.

Three authors assessed each trial's risk of bias independently. We assessed selection bias (randomisation, allocation concealment) performance bias (blinding of participant and health personnel), detection bias (blinding of outcome assessment), attrition bias (incomplete outcome data), reporting bias (selective reporting) and other bias (recall bias, transfer bias and etc). We resolved any disagreements by discussion. We assessed the quality of evidence for primary and secondary outcomes according to GRADE methodology for risk of bias, inconsistency, indirectness, imprecision, and publication bias; classified as very low, low, moderate, or high(10).

We analysed data using Review Manager 5.3 software(11) and if appropriate, used random-effects model to pool data. We assessed the presence of heterogeneity in two steps. First, we assessed obvious heterogeneity at face value by comparing populations, settings, interventions and outcomes. Then, we assessed statistical heterogeneity by means of the  $I^2$  statistic. We interpreted the heterogeneity as; 0% to 40% represent might not be important, 30% to 60% may represent moderate heterogeneity, 50% to 90% may represent substantial heterogeneity and 75% to 100% would be considerable heterogeneity.

We measured the treatment effect using risk ratios (RRs) and risk difference (RD) for dichotomous outcomes and mean differences (MDs) or standardized mean difference (SMD);

1  
2  
3 both with 95% confidence intervals (CIs) for continuous outcomes. We conducted subgroup  
4 analyses based on the different dosage of CoQ10 and if it is combined with another  
5 supplementation. We explored the potential sources of heterogeneity when it is present. We  
6 checked all included trials for unit of analysis errors. Unit of analysis errors can occur when  
7 trials randomize participants to intervention or control groups in clusters, but analysed the  
8 results using the total number of individual participants. We adjusted results from trials showed  
9 unit of analysis errors based on the mean cluster size and intracluster correlation  
10 coefficient(12). We contacted the original trial's authors to request missing or inadequately  
11 reported data. We performed analyses on the available data if missing data are not available.  
12 We performed sensitivity analysis to investigate the impact of risk of bias for sequence  
13 generation and allocation concealment of included studies.  
14  
15  
16  
17  
18  
19  
20  
21  
22  
23  
24  
25  
26  
27  
28

## 29 **Results**

30  
31  
32 We retrieved 65 records from the search of the electronic databases and one record from other  
33 sources (refer Supplementary file 2, figure 1). We screened a total of 60 records. We reviewed  
34 full text of 16 studies and excluded 10 studies because all of it were non-randomized controlled  
35 trials(4, 13-21). Therefore, we included only six studies in this review.  
36  
37  
38  
39  
40  
41

42 We included six studies with a total of 723 participants(22-27). Two out of six studies (and one  
43 study that contributed to the primary outcome) declared funding from drug manufacturers(24,  
44 27). Two of the six studies were multicentre trials in high-income countries(24, 27). Three  
45 studies involved a total of 182 female gender only as participants(22, 23, 26) and another three  
46 studies included on both sexes and involving 210 participants(24, 25, 27). All participants in  
47 the studies were randomised into intervention and control groups. Three studies reported using  
48 CoQ10 with other elements such as multivitamin(24), L-carnitine(25) and preventive  
49 medication in intervention group(22). One study used the medication in liquid formulation of  
50  
51  
52  
53  
54  
55  
56  
57  
58  
59  
60

1  
2  
3 water dispersed into nanoparticles(27), five studies used the medication in capsule  
4 formulation(22-26). Different dosages of CoQ10 were administered in the studies: minimum  
5 of 30 mg per day(25), 300 mg per day(27), 400 mg per day(23), 600 mg per day(24), and 800  
6 mg per day(22, 26). There was only one study t added preventive medication for migraine in  
7 the control group(22). Duration of treatment differs and was reported as 8 weeks in one  
8 study(25), and 3 months in five studies(22-24, 26, 27). Table 1 summarised the characteristics  
9 of the included trials.  
10  
11  
12  
13  
14  
15  
16  
17  
18  
19

20 All trials followed up the participants for a minimum of six weeks(22-27). Six study were  
21 included in the meta-analysis for the primary outcomes(22-27). We have also analysed  
22 according to subgroup by dosage of more and less than 400 mg of CoQ10. Secondary outcomes  
23 were reported in three trials(22, 24, 27). One study reported using several questionnaire for  
24 assessing quality of life affected by migraine(22), which were headache impact test (HIT-6)  
25 and migraine specific quality of life (MSQ) questionnaires to assess wellbeing and daily  
26 functioning; meanwhile migraine disability assessment (MIDAS) questionnaire to assess  
27 disability caused by migraine. The HIT-6 used scoring of 36–49 with higher scores indicate  
28 more severe effect of migraine, the MSQ reported the scores between zero and 100 with higher  
29 scores indicate better quality of life and the MIDAS reported the scores between zero and 35  
30 with higher scores indicate severe disability. We excluded 10 studies and all were non-  
31 randomized controlled trials(4, 13-21).  
32  
33  
34  
35  
36  
37  
38  
39  
40  
41  
42  
43  
44  
45  
46  
47  
48  
49  
50  
51  
52  
53  
54  
55  
56  
57  
58  
59  
60

Table 1: Characteristics of included trials in meta-analysis

| Studies                   | Size, n | Age   | % Female | BMI         | Diagnosis of migraine criteria       | CoQ10 enzyme maximum dose/day |
|---------------------------|---------|-------|----------|-------------|--------------------------------------|-------------------------------|
| Sandor, 2005              | 42      | 38.65 | 80.9     | Not mention | International Headache Society (IHS) | 100 mg                        |
| Nattagh - Eshtivani, 2018 | 46      | 32.7  | 100      | 25.16       | International Headache Society (IHS) | 800mg                         |
| Dahri, 2018               | 52      | 32.36 | 100      | 25.55       | International Headache Society (IHS) | 400mg                         |
| Hajihashemi, 2019         | 56      | 32.44 | 87.5     | 24.47       | International Headache Society (IHS) | 30mg                          |
| Gaul, 2015                | 112     | 38.4  | 86.6     | 38.4        | International Headache Society (IHS) | 600mg                         |
| Dahri, 2017               | 84      | 33.71 | 100      | 25.43       | International Headache Society (IHS) | 400mg                         |

### ***Risk of bias***

Assessment risk of bias is presented in graph and summary (refer supplementary file 3, figure 2a and figure 2b). The proportion of studies assessed as low, high or unclear risk of bias for each risk of bias domain (refer supplementary file 3, figure 2a). Detection bias domain had 50% of low risk with attrition and reporting bias domains around 80% of low risk. The risk of bias summary for individual studies showed in supplementary file 3, figure 2b. Three studies had unclear risk for detection bias(22, 26, 27) and for attrition and reporting bias, only one trial had high risk of bias(24).

Six studies described the method of randomisation used and all studies randomised the participants according to block randomization(22-27). Allocation concealment was mentioned in all six studies(22-27). Six studies mentioned about blinding the personnel and participants(22-27). Three studies did not state on the assessment of outcomes(22, 26, 27). All six studies measured the primary outcomes and were assessed at three months post intervention(22-27). All six studies had less than 20% loss to follow-up. Three studies measured the secondary outcomes(22, 24, 27). Only one study carried out an intention-to-treat analysis in which the participants were analysed according to the groups that they were initially assigned(22). All studies reported the outcomes as specified in their methods section(22-27). We detected no other potential sources of bias.

### ***Effects of interventions***

#### ***a) Primary outcomes***

Six studies reported severity of headache during migraine attack after taking CoQ10 for at least six weeks(22-27). The meta-analysis found no significant reduction in severity of headache with CoQ10 (MD -1.33, 95% CI: -2.97 to 0.31; I<sup>2</sup> statistic = 99%; P = 0.110; 6 trials; 371 participants) (refer Supplementary file 4, Figure 3a). With more than 400 mg (MD -1.33, 95%

1  
2  
3 CI -2.75 to 0.08, random effects;  $I^2$  statistic = 0%;  $P = 0.07$ ; 3 trials; 167 participants) or less  
4  
5 than 400 mg (MD -1.27; 95% CI -3.42 to 0.89; random effects;  $I^2$  statistic = 100%;  $P = 0.25$ ; 3  
6  
7 trials; 204 participants) per day of CoQ10, there is no difference in the severity of headache  
8  
9 compared to the control group.  
10  
11

12  
13 All six studies reported on the duration of headache attacks per month(22-27). CoQ10 reduce  
14  
15 the duration of headache attacks compared to the control group (MD -0.19, 95% CI -0.27 to -  
16  
17 0.11; random effects;  $I^2$  statistic = 0%;  $P < 0.00001$ ; 6 trials, 372 participants) (refer  
18  
19 Supplementary file 4, figure 3b).  
20  
21

22  
23 Five studies reported on the frequency of migraine headache per month(22, 23, 25-27). CoQ10  
24  
25 reduce the frequency of migraine headache compared to the control group (MD -1.52, 95% CI  
26  
27 -2.40 to -0.65; random effects;  $I^2$  statistic = 0%;  $P = <0.001$ ; 5 trials, 259 participants) (refer  
28  
29 Supplementary file 4, Figure 3c).  
30  
31

### 32 33 *b) Secondary outcomes* 34

35  
36 One study reported on number of days with nausea due to migraine headache during the study  
37  
38 period(27). The study showed significant difference between the CoQ10 supplementation and  
39  
40 control groups in the reduction of nausea due to migraine headache (MD -1.70; 95% CI -2.92  
41  
42 to -0.48;  $P = 0.006$ ; 1 trial, 42 participants). No other study reported on this outcome. One study  
43  
44 reported the numbers of acute migraine medication during the study period (MD 0.02; 95% CI  
45  
46 -0.42 to 0.46;  $P = 0.91$ ; 1 trial, 42 participants)(27).  
47  
48

49  
50 Only one trial measured the quality of life among patients with migraine headache(22).  
51  
52 Migraine-specific quality of life (MSQ) questionnaire reported on role restrictive (MD 17.85;  
53  
54 95% CI 9.59 to 26.11;  $P < 0.0001$ ; 1 trial, 77 participants), role preventive (MD 17.16; 95% CI  
55  
56 8.75 to 25.57;  $P < 0.0001$ ; 1 trial, 77 participants) and emotional functioning (MD 16.68, 95%  
57  
58 CI 6.70 to 26.66;  $P = 0.001$ ; 1 trial, 77 participants). The Headache Impact Test (HIT-6) score  
59  
60



1  
2  
3 reported on impact of the well-being and daily performance (MD -4.29; 95% CI -7.19 to -1.39;  
4  
5 P = 0.004; 1 trial: 77 participants) and Migraine Disability Assessment (MIDAS) score on  
6  
7 disability (MD -6.00; 95% CI -9.93 to -2.07; P = 0.003; 1 trial: 77 participants). One trial  
8  
9 involving 10 participants reported the adverse effects outcome on diarrhoea (OR 4.44; 95% CI  
10  
11 0.90 to 21.79; P = 0.07) and chromaturia (OR 19.45; 95% CI 1.10 to 344.70; P = 0.04)(24) and  
12  
13 they are not different compared to the control group.  
14  
15

## 16 17 **DISCUSSION**

### 18 19 **Summary of main results**

20  
21  
22 This review was designed to include all RCTs addressing the effectiveness of CoQ10 as one of  
23  
24 the ways to prevent migraine. There was significant reduction in duration of migraine by 0.19  
25  
26 point and frequency of migraine by 1.52 point during the follow up. Meanwhile, there were no  
27  
28 significant difference in severity of headache during attack compared to control group even by  
29  
30 subgroup analysis according to the different dosages of CoQ10. Nausea event caused by  
31  
32 migraine improved with CoQ10 but was limited in the number of trials. Report on adverse  
33  
34 events was limited to minor side effects, which included episodes of diarrhoea and chromaturia  
35  
36 and showed no difference with CoQ10.  
37  
38  
39  
40  
41  
42

### 43 44 **Overall completeness and applicability of evidence**

45  
46 We performed a comprehensive and extensive literature review to assess the effectiveness of  
47  
48 CoQ10 supplement as prevention for migraine. In all those study, females are more compared  
49  
50 to males in all study populations as it was one of the risk factors for migraine(28, 29). On this  
51  
52 review we limited the participants to adults only because of limited studies and a few of it  
53  
54 showed other supplements such as riboflavin also can prevent migraine(30). All studies had  
55  
56 small number of participants and this limit the applicability of CoQ10 thus the samples size  
57  
58 needed to be increased for better result. From the reported incidence of adverse events, we were  
59  
60

1  
2  
3 able to detect side effects, which are diarrhoea and chromaturia. The information on adverse  
4 events came from one trial involving 10 participants and there is a lack of information on more  
5  
6 rare and serious adverse events.  
7  
8  
9

### 10 **Quality of the evidence**

11  
12  
13  
14 Generally, there were a low risk of bias for most studies in most domains. There was no  
15 evidence of selective reporting bias although there was one study with high bias, but other  
16 studies had clear protocols. Besides that, in this meta-analysis showed few of unclear risk of  
17 bias on blinding of outcome assessment that can lead to treatment effect bias in the original  
18 study and the subsequent review. The risk of attrition bias was present in one trial. Attrition  
19 bias was high risk in one study due to high proportion of sample excluded in both intervention  
20 and control study with no intention to treat analysis been stated in the study (Supplementary  
21 file 3, Figure 2b). Loss to follow-up was less than 20% in all six trials and one trial carried out  
22 intention-to-treat analysis. Only one trial declared funding from pharmaceuticals company. For  
23 most of our meta-analysis we encountered low study samples. Therefore, the overall level of  
24 evidence contributing to this review as assessed using the GRADE approach is of low to  
25 moderate quality.  
26  
27  
28  
29  
30  
31  
32  
33  
34  
35  
36  
37  
38  
39  
40  
41

### 42 **Potential biases in the review process**

43  
44  
45 We attempted to reduce publication bias by checking the reference lists of all related studies  
46 for further references and searching multiple databases without language restriction. However,  
47 we cannot be certain that we have located all the trials in this area. There were six included  
48 studies and we were not able to construct a funnel plot for detecting publication bias. Not all  
49 included studies reported all outcomes. Although the included studies all showed the same  
50 direction of effect, we encountered low to high heterogeneity in our primary outcomes. The  
51 high heterogeneity was not able to be explained through the subgroup analysis.  
52  
53  
54  
55  
56  
57  
58  
59  
60

### **Agreements and disagreements with other studies or reviews**

There were other two systematic review and meta-analysis been published in year 2019 regarding on effects of CoQ10 supplementation on clinical features of migraine and vitamins and minerals for migraine prophylaxis(31, 32). Okoli et al. evaluated the efficacy of all types of vitamins including CoQ10 as migraine prophylaxis(31). Three out of 18 trials included in the review evaluated CoQ10(24, 27, 33). They found no reduction in frequency, duration and severity of migraine with CoQ10. Parohan et al.(32) included four trials(23, 27, 34, 35) in which two of the trials were included in our meta-analysis(23, 27). We removed the remaining two of trials because the study methods were not matched to our reviewed(34, 35). It reported that CoQ10 reduced the frequency migraine attack but no significant effect on severity and duration of migraine attacks. We found no other systematic reviews that reported on our other pre specified secondary outcomes.

### **Limitation of review**

Quality of life with validated measurement tool should be assessed in more trials. Data on side effects are limited thus need to be explored further. New studies should be performed on bigger samples.

### **Conclusion**

CoQ10 appears to have beneficial effect on reduction of headache duration during attack and frequency of migraine attack. Therefore, the usage of CoQ10 can be recommended as prophylaxis in migraine.

## CONTRIBUTION OF AUTHORS

SB involved in designing the review, writing the protocol, reviewed the articles to decide for inclusion, carried out data extraction, assessing the quality of included articles, giving comments in interpreting results from data analysis and gave advice for writing the discussion.

SS involved in preparing the protocol, writing the protocol, searching literatures and reviewed articles to decide for inclusion, carried out data extraction, entering data and carried out data analysis, assessing quality of articles and writing discussions of review results.

NMN involved in coordinating the flow of the review process, reviewing literatures and articles to decide for inclusion, carried out data extraction and assisting results interpretation from data analysis, assessing quality of articles and gave advice for writing results of review and discussion.

NSI involved in coordinating the flow of the review process, gave comments and ideas in designing the review and gave advice for writing the discussion.

## FUNDING

None.

## PATIENT AND PUBLIC INVOLVEMENT

No patient or public involvement in this meta-analysis.

## COMPETING INTERESTS

None declared.

## DATA SHARING

No additional data available.

## REFERENCES

1. Lipton RB, Stewart WF, Diamond S, Diamond ML, Reed M. Prevalence and burden of migraine in the United States: data from the American Migraine Study II. *Headache*. 2001;41(7):646-57.
2. Steiner TJ, Stovner LJ, Vos T, Jensen R, Katsarava Z. Migraine is first cause of disability in under 50s: will health politicians now take notice? *J Headache Pain*. 2018;19(1):17-.
3. Lipton RB. Tracing transformation. *Neurology*. 2009;72(5 Supplement 1):S3.
4. Hershey AD, Powers SW, Vockell AL, Lecates SL, Ellinor PL, Segers A, et al. Coenzyme Q10 deficiency and response to supplementation in pediatric and adolescent migraine. *Headache*. 2007;47(1):73-80.
5. Ashina M, Tvedskov JF, Lipka K, Bilello J, Penkowa M, Olesen J. Matrix metalloproteinases during and outside of migraine attacks without aura. *Cephalalgia*. 2010;30(3):303-10.
6. Gursoy-Ozdemir Y, Qiu J, Matsuoka N, Bolay H, Bermpohl D, Jin H, et al. Cortical spreading depression activates and upregulates MMP-9. *The Journal of clinical investigation*. 2004;113(10):1447-55.
7. Sanoobar M, Eghtesadi S, Azimi A, Khalili M, Khodadadi B, Jazayeri S, et al. Coenzyme Q10 supplementation ameliorates inflammatory markers in patients with multiple sclerosis: a double blind, placebo, controlled randomized clinical trial. *Nutr Neurosci*. 2015;18(4):169-76.
8. Hagen K, Brenner E, Linde M, Gravdahl GB, Tronvik EA, Engstrom M, et al. Acetyl-L-carnitine versus placebo for migraine prophylaxis: A randomized, triple-blind, crossover study. *Cephalalgia*. 2015;35(11):987-95.
9. Bhagavan HN, Chopra RK. Coenzyme Q10: absorption, tissue uptake, metabolism and pharmacokinetics. *Free radical research*. 2006;40(5):445-53.
10. Guyatt GH, Oxman AD, Kunz R, Vist GE, Falck-Ytter Y, Schunemann HJ. What is "quality of evidence" and why is it important to clinicians? *BMJ (Clinical research ed)*. 2008;336(7651):995-8.
11. The Nordic Cochrane Centre TCC. Review Manager (RevMan). Version 5.3.: Copenhagen: The Nordic Cochrane Centre, The Cochrane Collaboration; 2014.
12. Higgins JPT TJ, Chandler J, Cumpston M, Li T, Page MJ, Welch VA. Cochrane Handbook for Systematic Reviews of Interventions version 6.0 (updated July 2019): *Cochrane*; 2019. Available from: Available from [www.training.cochrane.org/handbook](http://www.training.cochrane.org/handbook).
13. Airola G, Allais G, Castagnoli Gabellari I, Rolando S, Mana O, Benedetto C. Non-pharmacological management of migraine during pregnancy. *Neurological sciences : official journal of the Italian Neurological Society and of the Italian Society of Clinical Neurophysiology*. 2010;31 Suppl 1:S63-5.
14. Bianchi A, Salomone S, Caraci F, Pizza V, Bernardini R, D'Amato CC. Role of magnesium, coenzyme Q10, riboflavin, and vitamin B12 in migraine prophylaxis. *Vitamins and hormones*. 2004;69:297-312.
15. Carotenuto M, Esposito M. Nutraceuticals safety and efficacy in migraine without aura in a population of children affected by neurofibromatosis type I. *Neurological sciences : official journal of the Italian Neurological Society and of the Italian Society of Clinical Neurophysiology*. 2013;34(11):1905-9.
16. Dalla Volta G, Carli D, Zavarise P, Ngonga G, Vollaro S. P026. Pilot study on the use of coenzyme Q10 in a group of patients with episodic migraine without aura. *Journal of headache and pain ( varpagings)*. 2015;16(no pagination).
17. Daniel O, Mauskop A. Nutraceuticals in Acute and Prophylactic Treatment of Migraine. *Current treatment options in neurology*. 2016;18(4):14.
18. Di Lorenzo C. The use of a phytotherapeutic compound containing Tanacetum Parthenium and Andrographis, in combination with CoQ10 and Riboflavin, for migraine prophylaxis: a randomized double blind versus placebo clinical trial. Journal of headache and pain Conference: 12th european headache federation congress and the 32nd national congress of the italian society for the study of headaches Italy. 2018;19.

19. Esposito M, Carotenuto M. Ginkgolide B complex efficacy for brief prophylaxis of migraine in school-aged children: an open-label study. *Neurological sciences : official journal of the Italian Neurological Society and of the Italian Society of Clinical Neurophysiology*. 2011;32(1):79-81.
20. Gaul C, Danesch U, Diener H. A proprietary supplement containing riboflavin, magnesium and Q10 improves migraine symptoms in a randomized placebo-controlled double-blind trial. *Cephalalgia*. 2015;35(6 SUPPL. 1):45.
21. Rozen TD, Oshinsky ML, Gebeline CA, Bradley KC, Young WB, Shechter AL, et al. Open label trial of coenzyme Q10 as a migraine preventive. *Cephalalgia*. 2002;22(2):137-41.
22. Dahri M, Hashemilar M, Asghari-Jafarabadi M, Tarighat-Esfanjani A. Efficacy of coenzyme Q10 for the prevention of migraine in women: a randomized, double-blind, placebo-controlled study. *European Journal Of Integrative Medicine*. 2017;16:8-14.
23. Dahri M, Tarighat-Esfanjani A, Asghari-Jafarabadi M, Hashemilar M. Oral coenzyme Q10 supplementation in patients with migraine: effects on clinical features and inflammatory markers. *Nutritional Neuroscience*. 2018:1-9.
24. Gaul C, Diener HC, Danesch U. Improvement of migraine symptoms with a proprietary supplement containing riboflavin, magnesium and Q10: a randomized, placebo-controlled, double-blind, multicenter trial. *Journal Of Headache And Pain*. 2015;16:516.
25. Hajhashemi P, Askari G, Khorvash F, Reza Maracy M, Nourian M. The effects of concurrent Coenzyme Q10, L-carnitine supplementation in migraine prophylaxis: A randomized, placebo-controlled, double-blind trial. *Cephalalgia*. 2019:333102418821661.
26. Nattagh-Eshtivani E, Dahri M, Hashemilar M, Tarighat-Esfanjani A. The effect of Coenzyme Q10 supplementation on serum levels of lactate, pyruvate, matrix metalloproteinase 9 and nitric oxide in women with migraine. A double blind, placebo, controlled randomized clinical trial. *European Journal Of Integrative Medicine*. 2018;21:70-6.
27. Sandor PS, Di Clemente L, Coppola G, Saenger U, Fumal A, Magis D, et al. Efficacy of coenzyme Q10 in migraine prophylaxis: a randomized controlled trial. *Neurology*. 2005;64(4):713-5.
28. Lipton RB, Bigal ME, Diamond M, Freitag F, Reed ML, Stewart WF. Migraine prevalence, disease burden, and the need for preventive therapy. *Neurology*. 2007;68(5):343-9.
29. Manzoni GC, Torelli P. Epidemiology of migraine. *J Headache Pain*. 2003;4(Suppl 1):s18-s22.
30. Talebian A, Soltani B, Banafshe HR, Moosavi GA, Talebian M, Soltani S. Prophylactic effect of riboflavin on pediatric migraine: a randomized, double-blind, placebo-controlled trial. *Electron Physician*. 2018;10(2):6279-85.
31. Okoli GN, Rabbani R, Kashani HH, Wierzbowski AK, Neilson C, Mansouri B, et al. Vitamins and Minerals for Migraine Prophylaxis: A Systematic Review and Meta-analysis. *Can J Neurol Sci*. 2019;46(2):224-33.
32. Parohan M, Sarraf P, Javanbakht MH, Ranji-Burachaloo S, Djalali M. Effect of coenzyme Q10 supplementation on clinical features of migraine: a systematic review and dose-response meta-analysis of randomized controlled trials. *Nutr Neurosci*. 2019:1-8.
33. Khorvash F, Bagheri L, Ghasemi M, Ghaed-Amini A, Maracy MR. Coenzyme q10 in migraine prophylaxis: a randomized, double-blind, placebo-controlled clinical trial. *Journal of isfahan medical school*. 2016;33(358):1904-11.
34. Slater SK, Nelson TD, Kabbouche MA, LeCates SL, Horn P, Segers A, et al. A randomized, double-blinded, placebo-controlled, crossover, add-on study of CoEnzyme Q10 in the prevention of pediatric and adolescent migraine. *Cephalalgia*. 2011;31(8):897-905.
35. Shoeibi A, Olfati N, Soltani Sabi M, Salehi M, Mali S, Akbari Oryani M. Effectiveness of coenzyme Q10 in prophylactic treatment of migraine headache: an open-label, add-on, controlled trial. *Acta Neurologica Belgica*. 2017;117(1):103-9.

1  
2  
3 **Supplementary file 1: DETAILED SEARCH STRATEGY**  
4  
5  
6  
7

8 **MEDLINE search strategy**  
9

10 Pubmed - (migraine[Title/Abstract]) AND coenzyme q10[Title/Abstract]  
11  
12

13 MeSH data based"coenzyme Q10"[All Fields] OR coenzyme q10[Text Word]  
14  
15

16 migraine[Title/Abstract] AND q10[Title/Abstract]  
17  
18

19 migraine[Title/Abstract] AND ubiquinone[Title/Abstract]  
20  
21  
22  
23  
24

25 **CENTRAL search strategy**  
26  
27

28 migraine in Title Abstract Keyword AND coenzyme q10 in Title Abstract Keyword  
29  
30

31 migraine in Title Abstract Keyword AND ubiquinone in Title Abstract Keyword  
32  
33

34 migraine in Title Abstract Keyword AND q10 in Title Abstract Keyword  
35  
36

37 MeSH data based"coenzyme Q10"[All Fields] OR coenzyme q10[Text Word]  
38  
39  
40  
41  
42  
43  
44  
45  
46  
47  
48  
49  
50  
51  
52  
53  
54  
55  
56  
57  
58  
59  
60

Supplementary file 2: PRISMA FLOWCHART

Figure 1. PRISMA flowchart

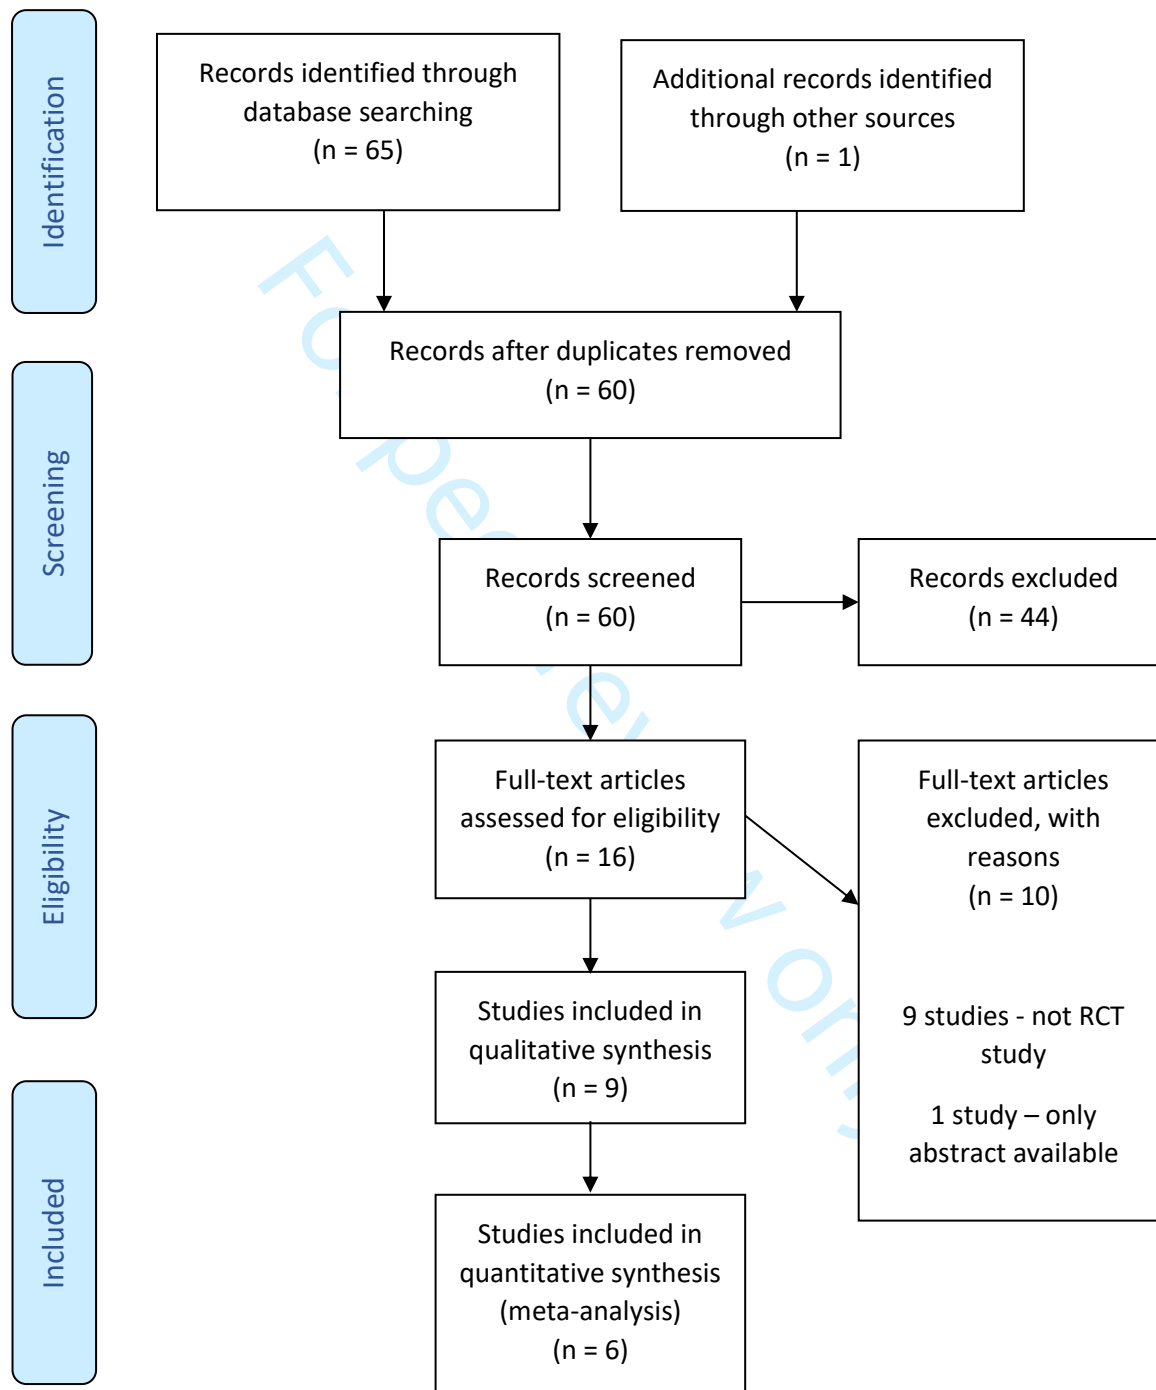



### Supplementary file 3: RISK OF BIAS ASSESSMENT (QUADAS 2)

Figure 2a: Risk of bias graph: review authors' judgements about each risk of bias item presented as percentages across all included studies.

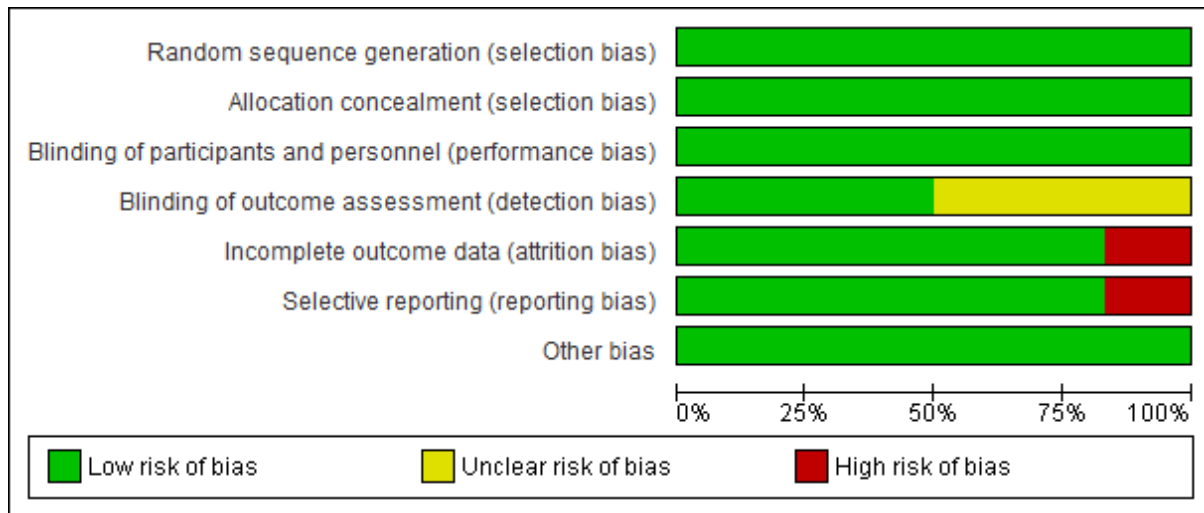

Figure 2b: Risk of bias summary: review authors' judgements about each risk of bias item for each included study.

|                            | Random sequence generation (selection bias) | Allocation concealment (selection bias) | Blinding of participants and personnel (performance bias) | Blinding of outcome assessment (detection bias) | Incomplete outcome data (attrition bias) | Selective reporting (reporting bias) | Other bias |
|----------------------------|---------------------------------------------|-----------------------------------------|-----------------------------------------------------------|-------------------------------------------------|------------------------------------------|--------------------------------------|------------|
| Dahri 2017                 | +                                           | +                                       | +                                                         | ?                                               | +                                        | +                                    | +          |
| Dahri 2018                 | +                                           | +                                       | +                                                         | +                                               | +                                        | +                                    | +          |
| Gaul 2015                  | +                                           | +                                       | +                                                         | +                                               | -                                        | -                                    | +          |
| Hajihashemi 2019           | +                                           | +                                       | +                                                         | +                                               | +                                        | +                                    | +          |
| Nattagh-Eshtivani, E. 2018 | +                                           | +                                       | +                                                         | ?                                               | +                                        | +                                    | +          |
| Sandor 2005                | +                                           | +                                       | +                                                         | ?                                               | +                                        | +                                    | +          |

**Supplementary file 4: FOREST PLOT OF PRIMARY OUTCOMES**

Figure 3a: Forest plot of effects coenzyme Q10 versus control on severity of headache during attack

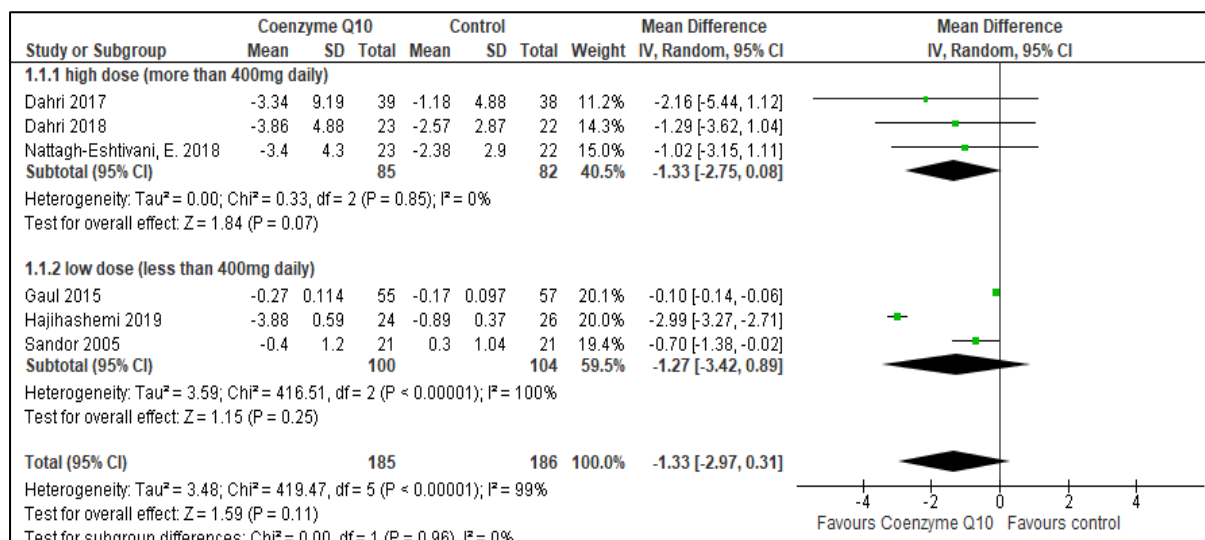

Figure 3b: Forest plot of effects coenzyme Q10 versus control on duration of headache attacks per month

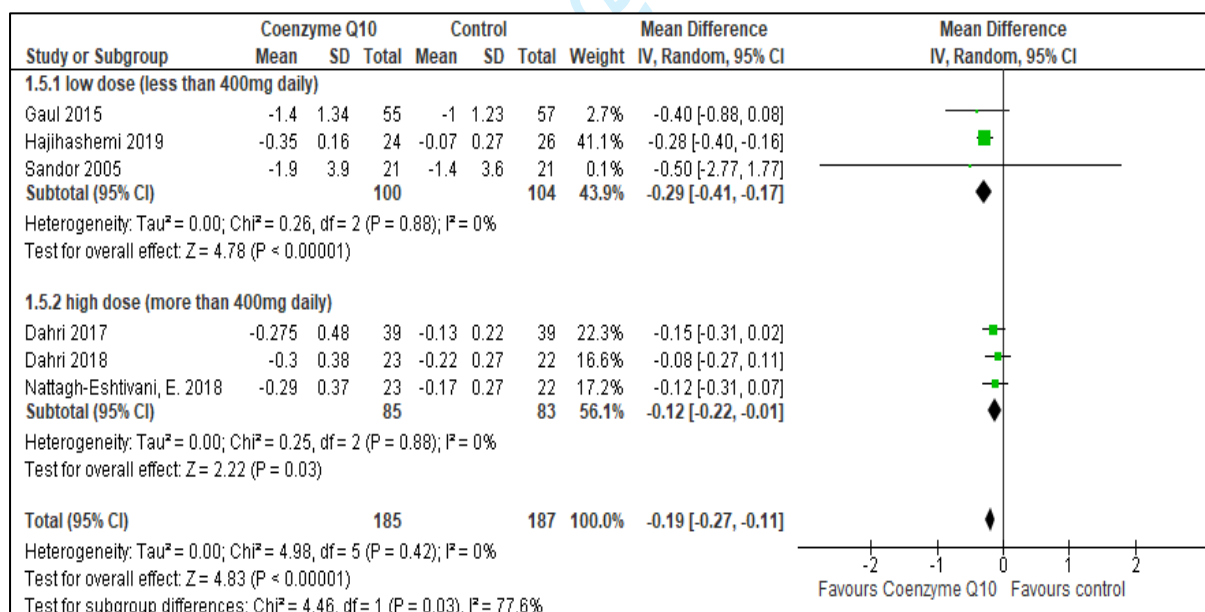

Figure 3c: Forest plot of effects coenzyme Q10 versus control on frequency of migraine headache per month

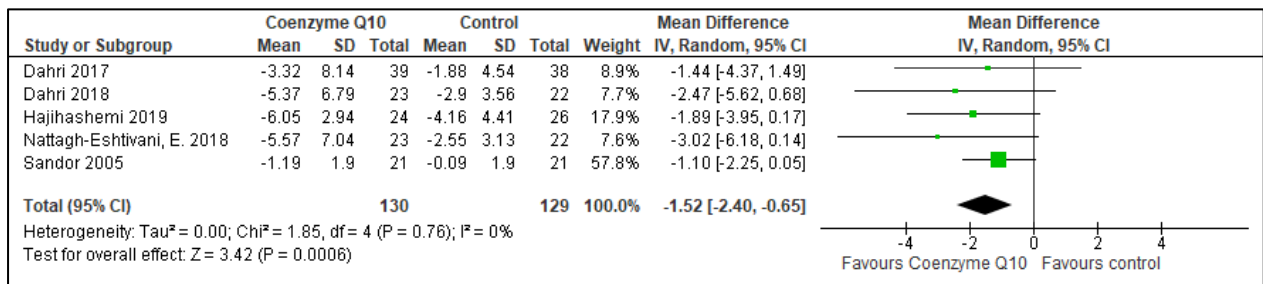

1  
2 **Appendix I: PRISMA Checklist**

| Section/topic                      | #  | Checklist item                                                                                                                                                                                                                                                                                              | Reported on page # of manuscript file (unless otherwise indicated) |
|------------------------------------|----|-------------------------------------------------------------------------------------------------------------------------------------------------------------------------------------------------------------------------------------------------------------------------------------------------------------|--------------------------------------------------------------------|
| <b>TITLE</b>                       |    |                                                                                                                                                                                                                                                                                                             |                                                                    |
| Title                              | 1  | Identify the report as a systematic review, meta-analysis, or both.                                                                                                                                                                                                                                         | 1                                                                  |
| <b>ABSTRACT</b>                    |    |                                                                                                                                                                                                                                                                                                             |                                                                    |
| Structured summary                 | 2  | Provide a structured summary including, as applicable: background; objectives; data sources; study eligibility criteria, participants, and interventions; study appraisal and synthesis methods; results; limitations; conclusions and implications of key findings; systematic review registration number. | 3                                                                  |
| <b>INTRODUCTION</b>                |    |                                                                                                                                                                                                                                                                                                             |                                                                    |
| Rationale                          | 3  | Describe the rationale for the review in the context of what is already known.                                                                                                                                                                                                                              | 6                                                                  |
| Objectives                         | 4  | Provide an explicit statement of questions being addressed with reference to participants, interventions, comparisons, outcomes, and study design (PICOS).                                                                                                                                                  | 6                                                                  |
| <b>METHODS</b>                     |    |                                                                                                                                                                                                                                                                                                             |                                                                    |
| Protocol and registration          | 5  | Indicate if a review protocol exists, if and where it can be accessed (e.g., Web address), and, if available, provide registration information including registration number.                                                                                                                               | 6                                                                  |
| Eligibility criteria               | 6  | Specify study characteristics (e.g., PICOS, length of follow-up) and report characteristics (e.g., years considered, language, publication status) used as criteria for eligibility, giving rationale.                                                                                                      | 7                                                                  |
| Information sources                | 7  | Describe all information sources (e.g., databases with dates of coverage, contact with study authors to identify additional studies) in the search and date last searched.                                                                                                                                  | 7                                                                  |
| Search                             | 8  | Present full electronic search strategy for at least one database, including any limits used, such that it could be repeated.                                                                                                                                                                               | 7, Supplementary file 1                                            |
| Study selection                    | 9  | State the process for selecting studies (i.e., screening, eligibility, included in systematic review, and, if applicable, included in the meta-analysis).                                                                                                                                                   | 7-8, Supplementary file 2 (figure 1)                               |
| Data collection process            | 10 | Describe method of data extraction from reports (e.g., piloted forms, independently, in duplicate) and any processes for obtaining and confirming data from investigators.                                                                                                                                  | 8                                                                  |
| Data items                         | 11 | List and define all variables for which data were sought (e.g., PICOS, funding sources) and any assumptions and simplifications made.                                                                                                                                                                       | 8-9                                                                |
| Risk of bias in individual studies | 12 | Describe methods used for assessing risk of bias of individual studies (including specification of whether this was done at the study or outcome level), and how this information is to be used in any data synthesis.                                                                                      | 8                                                                  |
| Summary measures                   | 13 | State the principal summary measures (e.g., risk ratio, difference in means).                                                                                                                                                                                                                               | 8-9                                                                |

3  
4  
5  
6  
7  
8  
9  
10  
11  
12  
13  
14  
15  
16  
17  
18  
19  
20  
21  
22  
23  
24  
25  
26  
27  
28  
29  
30  
31  
32  
33  
34  
35  
36  
37  
38  
39  
40  
41  
42  
43  
44  
45  
46  
47

|    |                               |    |                                                                                                                                                                                                          |                                                |
|----|-------------------------------|----|----------------------------------------------------------------------------------------------------------------------------------------------------------------------------------------------------------|------------------------------------------------|
| 1  | Synthesis of results          | 14 | Describe the methods of handling data and combining results of studies, if done, including measures of consistency (e.g., $I^2$ ) for each meta-analysis.                                                | 8-9                                            |
| 2  | Risk of bias across studies   | 15 | Specify any assessment of risk of bias that may affect the cumulative evidence (e.g., publication bias, selective reporting within studies).                                                             | 8                                              |
| 3  |                               |    |                                                                                                                                                                                                          |                                                |
| 4  | Additional analyses           | 16 | Describe methods of additional analyses (e.g., sensitivity or subgroup analyses, meta-regression), if done, indicating which were pre-specified.                                                         | 9                                              |
| 5  |                               |    |                                                                                                                                                                                                          |                                                |
| 6  | <b>RESULTS</b>                |    |                                                                                                                                                                                                          |                                                |
| 7  |                               |    |                                                                                                                                                                                                          |                                                |
| 8  | Study selection               | 17 | Give numbers of studies screened, assessed for eligibility, and included in the review, with reasons for exclusions at each stage, ideally with a flow diagram.                                          | 9, Supplementary file 2 (figure 1)             |
| 9  |                               |    |                                                                                                                                                                                                          |                                                |
| 10 | Study characteristics         | 18 | For each study, present characteristics for which data were extracted (e.g., study size, PICOS, follow-up period) and provide the citations.                                                             | 10, table 1                                    |
| 11 |                               |    |                                                                                                                                                                                                          |                                                |
| 12 | Risk of bias within studies   | 19 | Present data on risk of bias of each study and, if available, any outcome level assessment (see item 12).                                                                                                | 12, Supplementary file 3 (figure 2a,2b)        |
| 13 |                               |    |                                                                                                                                                                                                          |                                                |
| 14 | Results of individual studies | 20 | For all outcomes considered (benefits or harms), present, for each study: (a) simple summary data for each intervention group (b) effect estimates and confidence intervals, ideally with a forest plot. | 12-13, Supplementary file 4 (figure 3a, 3b,3c) |
| 15 |                               |    |                                                                                                                                                                                                          |                                                |
| 16 |                               |    |                                                                                                                                                                                                          |                                                |
| 17 |                               |    |                                                                                                                                                                                                          |                                                |
| 18 | Synthesis of results          | 21 | Present results of each meta-analysis done, including confidence intervals and measures of consistency.                                                                                                  | 12-13                                          |
| 19 |                               |    |                                                                                                                                                                                                          |                                                |
| 20 | Risk of bias across studies   | 22 | Present results of any assessment of risk of bias across studies (see Item 15).                                                                                                                          | 12, Supplementary file 3 (figure 2a,2b)        |
| 21 |                               |    |                                                                                                                                                                                                          |                                                |
| 22 | Additional analysis           | 23 | Give results of additional analyses, if done (e.g., sensitivity or subgroup analyses, meta-regression [see Item 16]).                                                                                    | 13-14                                          |
| 23 |                               |    |                                                                                                                                                                                                          |                                                |
| 24 | <b>DISCUSSION</b>             |    |                                                                                                                                                                                                          |                                                |
| 25 |                               |    |                                                                                                                                                                                                          |                                                |
| 26 | Summary of evidence           | 24 | Summarize the main findings including the strength of evidence for each main outcome; consider their relevance to key groups (e.g., healthcare providers, users, and policy makers).                     | 14                                             |
| 27 |                               |    |                                                                                                                                                                                                          |                                                |
| 28 | Limitations                   | 25 | Discuss limitations at study and outcome level (e.g., risk of bias), and at review-level (e.g., incomplete retrieval of identified research, reporting bias).                                            | 15-16                                          |
| 29 |                               |    |                                                                                                                                                                                                          |                                                |
| 30 | Conclusions                   | 26 | Provide a general interpretation of the results in the context of other evidence, and implications for future research.                                                                                  | 16                                             |
| 31 |                               |    |                                                                                                                                                                                                          |                                                |
| 32 | <b>FUNDING</b>                |    |                                                                                                                                                                                                          |                                                |
| 33 |                               |    |                                                                                                                                                                                                          |                                                |
| 34 | Funding                       | 27 | Describe sources of funding for the systematic review and other support (e.g., supply of data); role of funders for the systematic review.                                                               | 17                                             |
| 35 |                               |    |                                                                                                                                                                                                          |                                                |
| 36 |                               |    |                                                                                                                                                                                                          |                                                |
| 37 |                               |    |                                                                                                                                                                                                          |                                                |
| 38 |                               |    |                                                                                                                                                                                                          |                                                |
| 39 |                               |    |                                                                                                                                                                                                          |                                                |
| 40 |                               |    |                                                                                                                                                                                                          |                                                |
| 41 |                               |    |                                                                                                                                                                                                          |                                                |
| 42 |                               |    |                                                                                                                                                                                                          |                                                |
| 43 |                               |    |                                                                                                                                                                                                          |                                                |
| 44 |                               |    |                                                                                                                                                                                                          |                                                |
| 45 |                               |    |                                                                                                                                                                                                          |                                                |
| 46 |                               |    |                                                                                                                                                                                                          |                                                |
| 47 |                               |    |                                                                                                                                                                                                          |                                                |

# BMJ Open

## COENZYME Q10 SUPPLEMENTATION FOR PROPHYLAXIS IN ADULT PATIENTS WITH MIGRAINE –A META-ANALYSIS

|                                 |                                                                                                                                                                                                                                                                                                                                                                                                        |
|---------------------------------|--------------------------------------------------------------------------------------------------------------------------------------------------------------------------------------------------------------------------------------------------------------------------------------------------------------------------------------------------------------------------------------------------------|
| Journal:                        | <i>BMJ Open</i>                                                                                                                                                                                                                                                                                                                                                                                        |
| Manuscript ID                   | bmjopen-2020-039358.R1                                                                                                                                                                                                                                                                                                                                                                                 |
| Article Type:                   | Original research                                                                                                                                                                                                                                                                                                                                                                                      |
| Date Submitted by the Author:   | 29-Oct-2020                                                                                                                                                                                                                                                                                                                                                                                            |
| Complete List of Authors:       | Sazali, Suhairul; Universiti Sains Malaysia - Kampus Kesihatan, Department of Family Medicine<br>Badrin, Salziyan; Universiti Sains Malaysia - Kampus Kesihatan, Department of Family Medicine<br>Norhayati, Mohd Noor; Universiti Sains Malaysia - Kampus Kesihatan, Department of Family Medicine<br>Idris, Nur Suhaila; Universiti Sains Malaysia - Kampus Kesihatan, Department of Family Medicine |
| <b>Primary Subject Heading</b>: | Neurology                                                                                                                                                                                                                                                                                                                                                                                              |
| Secondary Subject Heading:      | Complementary medicine                                                                                                                                                                                                                                                                                                                                                                                 |
| Keywords:                       | Migraine < NEUROLOGY, COMPLEMENTARY MEDICINE, Neurology < INTERNAL MEDICINE                                                                                                                                                                                                                                                                                                                            |
|                                 |                                                                                                                                                                                                                                                                                                                                                                                                        |

SCHOLARONE™  
Manuscripts



I, the Submitting Author has the right to grant and does grant on behalf of all authors of the Work (as defined in the below author licence), an exclusive licence and/or a non-exclusive licence for contributions from authors who are: i) UK Crown employees; ii) where BMJ has agreed a CC-BY licence shall apply, and/or iii) in accordance with the terms applicable for US Federal Government officers or employees acting as part of their official duties; on a worldwide, perpetual, irrevocable, royalty-free basis to BMJ Publishing Group Ltd ("BMJ") its licensees and where the relevant Journal is co-owned by BMJ to the co-owners of the Journal, to publish the Work in this journal and any other BMJ products and to exploit all rights, as set out in our [licence](#).

The Submitting Author accepts and understands that any supply made under these terms is made by BMJ to the Submitting Author unless you are acting as an employee on behalf of your employer or a postgraduate student of an affiliated institution which is paying any applicable article publishing charge ("APC") for Open Access articles. Where the Submitting Author wishes to make the Work available on an Open Access basis (and intends to pay the relevant APC), the terms of reuse of such Open Access shall be governed by a Creative Commons licence – details of these licences and which [Creative Commons](#) licence will apply to this Work are set out in our licence referred to above.

Other than as permitted in any relevant BMJ Author's Self Archiving Policies, I confirm this Work has not been accepted for publication elsewhere, is not being considered for publication elsewhere and does not duplicate material already published. I confirm all authors consent to publication of this Work and authorise the granting of this licence.

1  
2  
3 **Title: COENZYME Q10 SUPPLEMENTATION FOR PROPHYLAXIS IN ADULT**  
4  
5 **PATIENTS WITH MIGRAINE –A META-ANALYSIS**  
6  
7

8  
9 Suhairul Sazali<sup>1</sup>, Salziyan Badrin<sup>1</sup>, Norhayati Mohd Noor<sup>1</sup>, Nur Suhaila Idris<sup>1</sup>  
10

11 <sup>1</sup> Department of Family Medicine, School of Medical Sciences, Universiti Sains Malaysia,  
12 16150 Kubang Kerian, Kelantan, Malaysia  
13

14  
15 **Authors:**

16 1. Suhairul Sazali

17 MD

18 Department of Family Medicine

19 School of Medical Sciences

20 Universiti Sains Malaysia

21 16150 Kubang Kerian

22 Kelantan, Malaysia

23 Email: suhairul\_sazali@yahoo.com  
24  
25

26 2. Salziyan Badrin (**Corresponding author**)

27 MD, MMed (Family Medicine)

28 Department of Family Medicine

29 School of Medical Sciences

30 Universiti Sains Malaysia

31 16150 Kubang Kerian

32 Kelantan, Malaysia

33 Email: salziyan@usm.my

34 Telephone number: +609-7676608

35 Fax number: +609-7653370  
36  
37

38  
39 3. Norhayati Mohd Noor

40 MBBS, M.Comm.Med, Ph.D

41 Department of Family Medicine

42 School of Medical Sciences

43 Universiti Sains Malaysia

44 16150 Kubang Kerian

45 Kelantan, Malaysia

46 Email: hayatikk@usm.my  
47  
48

49 4. Nur Suhaila Idris

50 MD, MMed (Family Medicine)

51 Department of Family Medicine

52 School of Medical Sciences

53 Universiti Sains Malaysia

54 16150 Kubang Kerian

55 Kelantan, Malaysia

56 Email: nursuhaila@usm.my  
57  
58  
59  
60



1  
2  
3 **Keyword:** Coenzyme Q10, Migraine, Supplementation  
4

5 **Word count:** 3361 words with exclusion of abstract, table and references.  
6  
7  
8  
9  
10  
11  
12  
13  
14  
15  
16  
17  
18  
19  
20  
21  
22  
23  
24  
25  
26  
27  
28  
29  
30  
31  
32  
33  
34  
35  
36  
37  
38  
39  
40  
41  
42  
43  
44  
45  
46  
47  
48  
49  
50  
51  
52  
53  
54  
55  
56  
57  
58  
59  
60

For peer review only

## Abstract

**Objective** To determine the effects of coenzyme Q10 (CoQ10) for reduction the severity, frequency of migraine attacks and duration of headache in adult patients with migraine.

**Design** Systematic review and meta- analysis.

**Data sources** Cochrane Central Register of Controlled Trials, CENTRAL, MEDLINE, EMBASE, Cumulative Index to Nursing and Allied Health Literature (CINAHL) and Psychological Information Database (PsycINFO) from inception till December 2019.

**Study selection** All randomized control trials (RCTs) comparing CoQ10 with placebo or used as an adjunct treatment included in this meta-analysis. Crossover designs and controlled clinical trials (CCT) were excluded.

**Data synthesis** Heterogeneity at face value by comparing populations, settings, interventions and outcomes were measured and statistical heterogeneity was assessed by means of the  $I^2$  statistic. The treatment effect for dichotomous outcomes were using risk ratios (RRs) and risk difference (RD), and for continuous outcomes, mean differences (MDs) or standardized mean difference (SMD); both with 95% confidence intervals (CIs) were used. Subgroup analyses were carried out for dosage of CoQ10 and if CoQ10 combined with another supplementation. Sensitivity analysis was used to investigate the impact risk of bias for sequence generation and allocation concealment of included studies.

**Results** Six studies with a total of 371 participants were included in meta-analysis. There is no statistically significant reduction in severity of migraine headache with CoQ10 supplementation. CoQ10 supplementation reduced the duration of headache attacks compared to the control group (mean difference -0.19, 95% CI -0.27 to -0.11; random effects;  $I^2$  statistic = 0%;  $P < 0.00001$ ). CoQ10 usage reduced the frequency of migraine headache compared to

1  
2  
3 the control group (MD -1.52, 95% CI -2.40 to -0.65; random effects; I<sup>2</sup> statistic = 0%; P =  
4  
5 <0.001).  
6  
7

8 **Conclusion** CoQ10 appears to have beneficial effects in reducing duration and frequency of  
9  
10 migraine attack.  
11  
12

13 **PROSPERO registration number** CRD42019126127  
14  
15  
16  
17  
18  
19  
20  
21  
22  
23  
24  
25  
26  
27  
28  
29  
30  
31  
32  
33  
34  
35  
36  
37  
38  
39  
40  
41  
42  
43  
44  
45  
46  
47  
48  
49  
50  
51  
52  
53  
54  
55  
56  
57  
58  
59  
60

For peer review only

## Strengths and limitations of this study

### Strengths

- The meta-analysis included randomized controlled trials only.
- The overall level of evidences assessed using the GRADE approach.
- Subgroup analysis and potential sources of heterogeneity explored.

### Limitation

- Small numbers of the included studies.

## Introduction

Migraine is an episodic disorder, the centrepiece of which is a severe headache generally associated with nausea and/or light and sound sensitivity. Migraine is a common disorder that affects up to 12% of the general population(1). Migraine is a debilitating brain disorder with serious social and financial consequences for the individual and the society(2). Migraine medications usually aim to reduce the frequency and intensity of headache attacks and few of the medications acts as preventive medication.

Low levels of the micronutrients such as riboflavin, magnesium and coenzyme in plasma and in the brain are reported in migraine patients(3). A deficit of these nutrients is thought to cause the migraine attacks. The cortical spreading depression is hypothesized to cause the elevation level of MMP-9 is associated with blood-brain barrier dysfunction and inflammation of nerves exacerbates migraine attacks(4, 5). The CoQ10, also known as ubiquinone, is one of the most important antioxidants that acts against hydrogen peroxide and other inflammatory markers of migraine along with reduction of expression cytokines and MMPs(6). CoQ10 is a vitamin-like compound, which can be synthesized by the body from phenylalanine and tyrosine. It has many roles in the body, especially in mitochondria and is thought to play a role in migraines, but the link is unknown(3). It acts as an important factor in the electron transport chain of mitochondria, which helps in energy metabolism and oxygen utilization in the brain and muscles(7). CoQ10 can be administered orally or parenterally. Peak blood levels occur 5–10 hours after oral administration. Elimination half-life is 33.19 hours(8). This meta-analysis aimed to determine the effectiveness of CoQ10 supplements as a prophylaxis for migraine in adult patients. The protocol for this meta-analysis is registered in International Prospective Register of Systematic review (PROSPERO) with trial number CRD42019126127, available from <https://www.crd.york.ac.uk/prospero>.

## Methods

Only randomized control trials (RCTs) comparing CoQ10 with placebo or as an adjunct treatment were accepted in the meta-analysis. All blinded and open-label studies were included in this meta-analysis. Crossover designs and controlled clinical trials (CCT) were excluded. We included the adult participants aged 18 till 50 years old of either sex or of any ethnicity. Supplementation with oral CoQ10 as monotherapy or in combinations with other dietary products, regardless in duration of therapy were included in the meta-analysis. Participants with migraine diagnosed by neurologist or physician according to either International Classification of Headache Disorder II (ICHD-II) or International Headache Society criteria (IHS) were included criteria for the meta-analysis. The primary outcomes and secondary outcomes in the trials that have been followed up for a minimum of 6 weeks after giving the interventions included in the meta-analysis.

### *Identification of study*

We searched the Cochrane Central Register of Controlled Trials, CENTRAL, MEDLINE, EMBASE, Cumulative Index to Nursing and Allied Health Literature (CINAHL) and Psychological Information Database (PsycINFO) from inception till December 2019. We used the search terms “coenzyme Q10”, “ubiquinone” and “migraine” with Boolean operators of AND and OR (Refer Supplementary file 1). We checked the reference list of identifying RCTs and review articles to find unpublished trials or trials not identified by electronic searches. We contacted the experts in the field and pharmaceutical companies which market CoQ10 to identify unpublished trials. We searched for ongoing trials through the World Health Organization (WHO) International Clinical Trials Registry Platform (ICTRP), <https://www.who.int/ictrp/en/> and [www.clinicaltrials.gov](http://www.clinicaltrials.gov). We excluded trials published other than the English language. We scanned the titles and abstracts from the searches and obtain

1  
2  
3 full-text articles when they appear to meet the eligibility criteria, or when there was insufficient  
4 information to assess the eligibility. We assessed the eligibility of the trials independently and  
5  
6 documented all the reasons for exclusion. We resolved any disagreements between the review  
7  
8 authors by discussion. We contacted the authors if clarification is needed.  
9  
10

### 11 12 13 ***Data Collection and analysis*** 14

15  
16 Three authors extracted data independently. We extracted data on the dosage and frequency of  
17  
18 CoQ10 supplementation, criteria for diagnosis of migraine, age, sex, ethnicity, and the  
19  
20 outcomes of each trials which include severity of the headache attacks, duration of headache  
21  
22 in migraine attacks, frequency of migraine attacks in a month, numbers of days with nausea,  
23  
24 numbers of analgesic used during headache attacks, numbers of acute migraine medication  
25  
26 used, quality of life and adverse effects of CoQ10 using data extraction form. Disagreements  
27  
28 between the review authors were resolved by discussion with the fourth author.  
29  
30

31  
32 The Cochrane Collaboration's risk-of-bias tools was used to assess the risk of bias in of the  
33  
34 included studies(9). Three authors assessed each trial's risk of bias independently. We assessed  
35  
36 selection bias (randomisation, allocation concealment), performance bias (blinding of  
37  
38 participant and health personnel), detection bias (blinding of outcome assessment), attrition  
39  
40 bias (incomplete outcome data), reporting bias (selective reporting) and other bias (recall bias,  
41  
42 transfer bias and etc). We resolved any disagreements by the discussion with the fourth author.  
43  
44 We assessed the quality of evidence for primary and secondary outcomes, according to the  
45  
46 GRADE methodology for risk of bias, inconsistency, indirectness, imprecision, and publication  
47  
48 bias; classified as very low, low, moderate, or high(10).  
49  
50  
51

52  
53 We analysed data using Review Manager 5.3 software(11). We used random-effects model to  
54  
55 pool data. We assessed the presence of heterogeneity in two steps. First, we assessed obvious  
56  
57 heterogeneity at face value by comparing populations, settings, interventions and outcomes.  
58  
59  
60

1  
2  
3 Then, we assessed statistical heterogeneity by means of the  $I^2$  statistic. We interpreted the  
4 heterogeneity as; 0% to 40% represent might not be important, 30% to 60% may represent  
5 moderate heterogeneity, 50% to 90% may represent substantial heterogeneity and 75% to 100%  
6 would be considerable heterogeneity(9).  
7  
8  
9  
10  
11

12  
13 We measured the treatment effect using risk ratios (RRs) and risk difference (RD) for  
14 dichotomous outcomes and mean differences (MDs) or standardized mean difference (SMD);  
15 both with 95% confidence intervals (CIs) for continuous outcomes. We conducted subgroup  
16 analyses based on the different dosage of CoQ10 and if CoQ10 is combined with another  
17 supplementation. We explored the potential sources of heterogeneity when it is present. We  
18 checked all included trials for unit of analysis errors. Unit of analysis errors can occur when  
19 trials randomize participants to intervention or control groups in clusters, but analysed the  
20 results using the total number of individual participants. We adjusted results from trials showed  
21 unit of analysis errors based on the mean cluster size and intraclass correlation coefficient(9).  
22  
23 We contacted the original trial's authors to request missing or inadequately reported data. We  
24 performed analyses on the available data if missing data are not available. We performed  
25 sensitivity analysis to investigate the impact of risk of bias for sequence generation and  
26 allocation concealment of included studies.  
27  
28  
29  
30  
31  
32  
33  
34  
35  
36  
37  
38  
39  
40  
41  
42  
43

## 44 **Results**

45  
46 We retrieved 65 records from the search of the electronic databases and one record from other  
47 sources (Supplementary file 2, Figure 1). We screened a total of 60 records. We reviewed full  
48 text of 16 studies and excluded another 10 studies because all of the studies were non-  
49 randomized controlled trials(3, 12-20). Therefore, we included only six studies in this review.  
50  
51  
52  
53  
54  
55

56 We included six studies with a total of 371 participants(21-26). In all the trials, diagnosis of  
57 migraine was done based on International Headache Society criteria. Two out of six studies  
58  
59  
60



1  
2  
3 (and one study that contributed to the primary outcome) declared funding from drug  
4 manufacturers(23, 26). Two out of six studies were multicentre trials in high-income  
5 countries(23, 26). Three studies involved a total of 167 female gender only as participants(21,  
6 22, 25) and another three studies involved on both genders and a total of 204 participants(23,  
7 24, 26). All the participants in the included studies were randomised into intervention and  
8 control groups. Three studies reported using CoQ10 with other elements such as  
9 multivitamin(23), L-carnitine(24) and preventive medication in the intervention group(21).  
10 One study used the medication in liquid formulation of water dispersed into nanoparticles (26),  
11 five studies used the medication in a capsule formulation(21-25). Different dosages of CoQ10  
12 were administered in the studies: minimum of 30 mg per day(24), 300 mg per day(26), 400 mg  
13 per day(22), 600 mg per day(23), and 800 mg per day(21, 25). All six trials excluded any  
14 participants who on migraine preventive drugs in the last six months, who have history of using  
15 CoQ10 or other antioxidants supplementation for at least 3 months prior to the enrolment(21-  
16 26). One trial also excluded participants who failed to respond to the usage of more than two  
17 different prophylactic agents in the past or any patients who were resistant to all acute migraine  
18 drugs(23). All six included studies used placebo(21-26) and there was only one trial added the  
19 preventive migraine medication to the placebo(21); however, the preventive medication was  
20 used for both the intervention and control groups in this trial(21). Duration of CoQ10 treatment  
21 differs among the trials and was reported at 8 weeks in one study(24), and at 3 months in five  
22 other studies(21-23, 25, 26). Table 1 summarised the characteristics of the included trials.  
23  
24  
25  
26  
27  
28  
29  
30  
31  
32  
33  
34  
35  
36  
37  
38  
39  
40  
41  
42  
43  
44  
45  
46  
47  
48  
49  
50  
51  
52  
53  
54  
55  
56  
57  
58  
59  
60

Table 1: Characteristics of included trials in the meta-analysis

| Studies                   | Size, n | Mean Age, years | Female, % | BMI, kg/m <sup>2</sup> | Diagnosis of migraine                         | Interventions                                                                                             | CoQ10 maximum dose per day |
|---------------------------|---------|-----------------|-----------|------------------------|-----------------------------------------------|-----------------------------------------------------------------------------------------------------------|----------------------------|
| Sandor, 2005              | 42      | 38.65           | 80.9      | Not mention            | International Headache Society (IHS) criteria | <b>Intervention:</b> CoQ10 liquid formulation of water dispersed nanoparticles<br><b>Control:</b> Placebo | 100 mg                     |
| Nattagh - Eshtivani, 2018 | 45      | 32.7            | 100.0     | 25.16                  | International Headache Society (IHS) criteria | <b>Intervention:</b> CoQ10 capsule<br><b>Control:</b> Placebo                                             | 800mg                      |
| Dahri, 2018               | 45      | 32.36           | 100.0     | 25.55                  | International Headache Society (IHS) criteria | <b>Intervention:</b> CoQ10 capsule<br><b>Control:</b> Placebo                                             | 400mg                      |
| Hajihashemi, 2019         | 50      | 32.44           | 87.5      | 24.47                  | International Headache Society (IHS) criteria | <b>Intervention:</b> CoQ10 capsule and L-carnitine<br><b>Control:</b> placebo                             | 30mg                       |
| Gaul, 2015                | 112     | 38.4            | 86.6      | 38.4                   | International Headache Society (IHS) criteria | <b>Intervention:</b> CoQ10 with multivitamins combination<br><b>Control:</b> Placebo                      | 600mg                      |
| Dahri, 2017               | 77      | 33.71           | 100.0     | 25.43                  | International Headache Society (IHS) criteria | <b>Intervention:</b> CoQ10 capsule plus preventive drugs<br><b>Control:</b> Placebo plus preventive drugs | 400mg                      |

1  
2  
3 All six included trials followed-up the participants for a minimum of six weeks(21-26). Six  
4 studies were included in analyses of the primary outcomes(21-26). We also analysed according  
5 to subgroup by dosage of more and less than 400 mg of CoQ10. Secondary outcomes reported  
6 in the three trials(21, 23, 26). One study reported using several questionnaires for assessing  
7 quality of life affected by migraine(21), which were headache impact test (HIT-6) and migraine  
8 specific quality of life (MSQ) questionnaires to assess wellbeing and daily functioning;  
9 meanwhile migraine disability assessment (MIDAS) questionnaire to assess disability caused  
10 by migraine. The HIT-6 used scoring of 36–49 with higher scores indicate more severe effect  
11 of migraine, the MSQ reported the scores between zero and 100 with higher scores indicate  
12 better quality of life and the MIDAS reported the scores between zero and 35 with higher scores  
13 indicate severe disability(21). We excluded 10 studies and all of the studies are non-  
14 randomized controlled trials(3, 12-20).

### 31 ***Risk of bias***

32  
33 Assessment risk of bias is shown in Figure 2a and Figure 2b (Refer Supplementary file 3,  
34 Figure 2a and Figure 2b). The proportion of studies assessed as low, high or unclear risk of  
35 bias for each risk of bias domain is presented in Figure 2a (Refer Supplementary file 3, Figure  
36 2a). Detection bias domain had 50% of low risk with attrition and reporting bias domains  
37 around 80% of low risk. The risk of bias summary for individual studies is showed in Figure  
38 2b (Refer Supplementary file 3, Figure 2b). Three studies had unclear risk for detection bias  
39 (21, 25, 26) and for attrition and reporting bias, only one trial had high risk of bias(23).

40  
41 All six studies described the method of randomisation used and randomised the participants  
42 according to block randomization(21-26). Allocation concealment was mentioned in all six  
43 included studies(21-26). All six studies mentioned about blinding the personnel and the  
44 participants(21-26). All six studies had less than 20% lost to follow-up and the reasons such as  
45  
46  
47  
48  
49  
50  
51  
52  
53  
54  
55  
56  
57  
58  
59  
60

1  
2  
3 major protocol violation(23), refused to continue the study(25, 26), failed to return to clinic(21,  
4  
5 22), pregnancy(21, 22, 24) and failed to keep diary(21, 22) and there were balanced between  
6  
7 both groups. Only one study carried out an intention-to-treat analysis in which the participants  
8  
9 were analysed according to the groups that they were initially assigned(21). All six studies  
10  
11 reported the outcomes as specified in their methods section(21-26). We detected no other  
12  
13 potential sources of bias.  
14  
15

### 16 17 18 ***Effects of interventions***

19  
20 All six studies measured the primary outcomes and assessed at three months post  
21  
22 intervention(21-26). Three studies measured the secondary outcomes(21, 23, 26). Three studies  
23  
24 did not state on the assessment of outcomes(21, 25, 26).  
25  
26

### 27 28 ***Primary outcomes***

29  
30 All six included studies reported severity of headache during migraine attack after taking  
31  
32 CoQ10 for at least six weeks(21-26). The meta-analysis found no significant reduction in  
33  
34 severity of headache with CoQ10 (MD -1.33, 95% CI: -2.97 to 0.31; I<sup>2</sup> statistic = 99%; P =  
35  
36 0.110; 6 trials; 371 participants) (Refer Supplementary file 3, Figure 3). With more than 400  
37  
38 mg (MD -1.33, 95% CI -2.75 to 0.08, random effects; I<sup>2</sup> statistic = 0%; P = 0.07; 3 trials; 167  
39  
40 participants) or less than 400 mg per day of CoQ10 (MD -1.27; 95% CI -3.42 to 0.89; random  
41  
42 effects; I<sup>2</sup> statistic = 100%; P = 0.25; 3 trials; 204 participants), there is no difference in the  
43  
44 severity of headache compared to the control group.  
45  
46  
47

48  
49 All six studies reported on the duration of headache attacks per month(21-26). There was  
50  
51 significant reduction of duration of headache attacks with CoQ10 as compared to the control  
52  
53 group (MD -0.19, 95% CI -0.27 to -0.11; random effects; I<sup>2</sup> statistic = 0%; P < 0.00001; 6 trials,  
54  
55 371 participants) (Refer Supplementary file 3, Figure 4).  
56  
57  
58  
59  
60

1  
2  
3 Five studies reported on the frequency of migraine headache per month(21, 22, 24-26). There  
4 was significant reduction in the frequency of migraine headache with the CoQ10 as compared  
5 to the control group (MD -1.52, 95% CI -2.40 to -0.65; random effects;  $I^2$  statistic = 0%;  $P =$   
6  
7  
8  
9  
10 <0.001; 5 trials, 259 participants) (Refer Supplementary file 3, Figure 5).  
11

12  
13 *a) Secondary outcomes*  
14

15  
16 One study reported on the number of days with nausea due to migraine headache during the  
17 study period(26). The CoQ10 supplementation reduced the number of days with nausea due to  
18 migraine headache (MD -1.70; 95% CI -2.92 to -0.48;  $P = 0.006$ ; 1 trial, 42 participants). No  
19 other study reported on this outcome. The same study reported the number of acute migraine  
20 medications usage during the study period(26). The CoQ10 supplementation reduced the  
21 number of acute migraine medications usage (MD 0.02; 95% CI -0.42 to 0.46;  $P = 0.91$ ; 1  
22 trial, 42 participants)(26).  
23  
24  
25  
26  
27  
28  
29  
30  
31

32  
33 Only one trial measured the quality of life among patients with migraine headache(21). Three  
34 types of questionnaire including Migraine-specific quality of life (MSQ), The Headache Impact  
35 Test (HIT-6) score and Migraine Disability Assessment (MIDAS) score were used to measure  
36 the impact of the treatment on migraine headache on quality of life(21). Migraine-specific  
37 quality of life (MSQ) questionnaire reported on role restrictive, role preventive and emotional  
38 functioning. There were no significant improvements in MSQ questionnaire on role restrictive  
39 (MD 17.85; 95% CI 9.59 to 26.11;  $P < 0.0001$ ; 1 trial, 77 participants), role preventive (MD  
40 17.16; 95% CI 8.75 to 25.57;  $P < 0.0001$ ; 1 trial, 77 participants) and emotional functioning  
41 (MD 16.68, 95% CI 6.70 to 26.66;  $P = 0.001$ ; 1 trial, 77 participants) with the CoQ10  
42 supplementation. The CoQ10 supplementation showed improvement in The Headache Impact  
43 Test (HIT-6) score (MD -4.29; 95% CI -7.19 to -1.39;  $P = 0.004$ ; 1 trial: 77 participants) and  
44 improvement in Migraine Disability Assessment (MIDAS) score (MD -6.00; 95% CI -9.93 to  
45  
46  
47  
48  
49  
50  
51  
52  
53  
54  
55  
56  
57  
58  
59  
60

1  
2  
3 -2.07; P = 0.003; 1 trial: 77 participants). One trial reported on the adverse effects outcome on  
4 diarrhoea (OR 4.44; 95% CI 0.90 to 21.79; P = 0.07) and chromaturia (OR 19.45; 95% CI 1.10  
5 to 344.70; P = 0.04)(23) and they not different in the CoQ10 group.  
6  
7  
8  
9

## 10 **DISCUSSION**

### 11 **Summary of main results**

12  
13  
14  
15  
16  
17 This review was designed to include all RCTs addressing the effectiveness of CoQ10 as one of  
18 the alternative medications for migraine prophylaxis. There was significant reduction in the  
19 duration of migraine by 0.19 point and the frequency of migraine by 1.52 point during the  
20 follow-up. Meanwhile, there was no significant reduction in severity of headache during attack  
21 even by subgroup analysis according to the different dosages of the CoQ10. Nausea event  
22 caused by migraine improved with CoQ10 but there was limited in the number of the trials.  
23 Report on adverse events was limited to the minor side effects, which include episodes of  
24 diarrhoea and chromaturia and showed no difference with CoQ10.  
25  
26  
27  
28  
29  
30  
31  
32  
33  
34  
35

### 36 **Overall completeness and applicability of evidence**

37  
38  
39 We performed a comprehensive and extensive literature review to assess the effectiveness of  
40 CoQ10 supplement as prevention for migraine. The numbers of female participants higher than  
41 males in all of the included studies as the highest population diagnosed with migraine is  
42 female(27, 28). On this review, we limited the participants to adult population because there  
43 was limited number of studies done in paediatric population and a few of the studies done  
44 involved other supplements such as riboflavin in paediatric population(29). All the included  
45 studies had small number of participants and this limit the applicability of CoQ10 thus the  
46 larger samples size is needed for a better result. The information on adverse events came from  
47 only one trial which are diarrhoea and chromaturia. There is limited information from the trials  
48 on other serious adverse events.  
49  
50  
51  
52  
53  
54  
55  
56  
57  
58  
59  
60

### Quality of the evidence

Generally, there were low risk of bias in most of the included studies in the domains. There was no evidence of selective reporting bias in all included trials. Although there was one study with high bias, the other studies had complete protocols. This meta-analysis found that there were a few of the studies has unclear risk of bias on blinding of the outcome assessment which can lead to the treatment effect bias in the original study and the subsequent review. The risk of attrition bias was present in one trial. Attrition bias in one study is due to high proportion of sample excluded in both intervention and control study with no intention to treat analysis been stated in the study (see Supplementary file 3, Figure 2b). We encountered low study samples in all trials. Therefore, the overall level of evidence contributing to outcomes of this review is low to moderate as assessed using the GRADE approach (Refer Table 2).

Table 2: The GRADE quality assessment for CoQ10

**Summary of findings:****Coenzyme Q10 compared to control for migraine prophylaxis****Patient or population:** Adults patient with migraine**Setting:** Health care centres**Intervention:** Coenzyme Q10**Comparison:** Placebo

| Outcomes                                                                   | Anticipated absolute effects*<br>(95% CI)                                  |                                                            | Relative effect<br>(95% CI) | No of<br>participants<br>(studies) | Certainty of the evidence<br>(GRADE) |
|----------------------------------------------------------------------------|----------------------------------------------------------------------------|------------------------------------------------------------|-----------------------------|------------------------------------|--------------------------------------|
|                                                                            | Risk with<br>control                                                       | Risk with<br>Coenzyme<br>Q10                               |                             |                                    |                                      |
| Severity of<br>headache during<br>attack<br>follow up: 6<br>weeks          | The mean<br>severity of<br>headache<br>during attack<br>was <b>0</b>       | MD <b>1.33<br/>lower</b><br>(2.97 lower to<br>0.31 higher) | -                           | 371<br>(6 RCTs)                    | ⊕⊕○○<br>LOW <sup>a</sup>             |
| Duration of<br>headache attacks<br>follow up: 6<br>weeks                   | The mean<br>duration of<br>headache<br>attacks was <b>0</b>                | MD <b>0.19<br/>lower</b><br>(0.27 lower to<br>0.11 lower)  | -                           | 371<br>(6 RCTs)                    | ⊕⊕⊕○<br>MODERATE <sup>b</sup>        |
| Frequency of<br>migraine<br>headache per<br>month<br>follow up: 6<br>weeks | The mean<br>frequency of<br>migraine<br>headache per<br>month was <b>0</b> | MD <b>1.52<br/>lower</b><br>(2.4 lower to<br>0.65 lower)   | -                           | 259<br>(5 RCTs)                    | ⊕⊕⊕○<br>MODERATE <sup>b</sup>        |

\*The risk in the intervention group (and its 95% confidence interval) is based on the assumed risk in the comparison group and the relative effect of the intervention (and its 95% CI).

CI: Confidence interval; MD: Mean difference; OR: Odds ratio

**GRADE Working Group grades of evidence**

**High certainty:** We are very confident that the true effect lies close to that of the estimate of the effect

**Moderate certainty:** We are moderately confident in the effect estimate: The true effect is likely to be close to the estimate of the effect, but there is a possibility that it is substantially different

**Low certainty:** Our confidence in the effect estimate is limited: The true effect may be substantially different from the estimate of the effect

**Very low certainty:** We have very little confidence in the effect estimate: The true effect is likely to be substantially different from the estimate of effect

<sup>a</sup> There is presence of the statistical heterogeneity, inconsistency and imprecision existed.

<sup>b</sup> Downgraded due to large confidence intervals from a small sample size and small number of included studies.



### Potential biases in the review process

We attempted to reduce publication bias by checking the reference lists of all related studies for further references and searching multiple databases. However, we cannot be certain that we have located all the trials in this area. There were six included studies, and we were not able to construct a funnel plot for detecting publication bias. Not all included studies reported all outcomes. Although the included studies all showed the same direction of effect, we encountered low to high heterogeneity in our primary outcomes. The high heterogeneity was not able to be explained through the subgroup analysis.

### Agreements and disagreements with other studies or reviews

There were other two systematic review and meta-analysis been published in year 2019 regarding the effects of CoQ10 supplementation on clinical features of migraine and vitamins and minerals for migraine prophylaxis(30, 31). Okoli *et al* evaluated the efficacy of all types of vitamins including CoQ10 as migraine prophylaxis(30). Three out of 18 trials included in the review evaluated CoQ10(23, 26, 32). They found no reduction in frequency, duration and severity of migraine with CoQ10. Parohan *et al*(31) included four trials(22, 26, 33, 34) in which two of the trials were included in our meta-analysis(22, 26). We removed the remaining two of trials because the study methods were not match to our reviewed(33, 34). They reported that CoQ10 reduced the frequency migraine attack but no significant effect on severity and duration of migraine attacks. We found no other systematic reviews that reported on our other pre specified secondary outcomes.

For future research, we recommend that quality of life with validated measurement tool should be used. Data on side effects are limited thus need to be explored further. New studies should be performed on bigger samples.

## Conclusion

CoQ10 appears to have beneficial effect on reduction of headache duration during attack and frequency of migraine attack.

For peer review only

## **CONTRIBUTION OF AUTHORS**

SB was involved in designing the review, writing the protocol, reviewed the articles to decide for inclusion, carried out data extraction, assessed the quality of articles, giving input in interpreting results from data analysis and gave input for writing the discussion.

SS was involved in preparing the protocol, writing the protocol, searching literatures and reviewed articles to decide for inclusion, carried out data extraction, entering data and carried out data analysis, assessing the quality of articles and writing the discussion of review results.

NMN was involved in co-ordinating the flow of the review process, reviewing literatures and articles to decide for inclusion, and assisting results interpretation from data analysis, assessing the quality of articles and gave input for writing results of review and discussion.

NSI was involved in co-ordinating the flow of the review process, gave input in designing the review, carried out data extraction and gave input for writing the discussion.

## **FUNDING**

None.

## **PATIENT AND PUBLIC INVOLVEMENT**

No patient or public involvement in this meta-analysis.

## **COMPETING INTERESTS**

None declared.

## **DATA SHARING**

No additional data available.

## REFERENCES

1. Lipton RB, Stewart WF, Diamond S, Diamond ML, Reed M. Prevalence and burden of migraine in the United States: data from the American Migraine Study II. *Headache*. 2001;41(7):646-57.
2. Steiner TJ, Stovner LJ, Vos T, Jensen R, Katsarava Z. Migraine is first cause of disability in under 50s: will health politicians now take notice? *The journal of headache and pain*. 2018;19(1):17-.
3. Hershey AD, Powers SW, Vockell AL, Lecates SL, Ellinor PL, Segers A, et al. Coenzyme Q10 deficiency and response to supplementation in pediatric and adolescent migraine. *Headache*. 2007;47(1):73-80.
4. Ashina M, Tvedskov JF, Lipka K, Bilello J, Penkowa M, Olesen J. Matrix metalloproteinases during and outside of migraine attacks without aura. *Cephalalgia : an international journal of headache*. 2010;30(3):303-10.
5. Gursoy-Ozdemir Y, Qiu J, Matsuoka N, Bolay H, Bempohl D, Jin H, et al. Cortical spreading depression activates and upregulates MMP-9. *The Journal of clinical investigation*. 2004;113(10):1447-55.
6. Sanoobar M, Eghtesadi S, Azimi A, Khalili M, Khodadadi B, Jazayeri S, et al. Coenzyme Q10 supplementation ameliorates inflammatory markers in patients with multiple sclerosis: a double blind, placebo, controlled randomized clinical trial. *Nutritional neuroscience*. 2015;18(4):169-76.
7. Hagen K, Brenner E, Linde M, Gravdahl GB, Tronvik EA, Engstrom M, et al. Acetyl-L-carnitine versus placebo for migraine prophylaxis: A randomized, triple-blind, crossover study. *Cephalalgia : an international journal of headache*. 2015;35(11):987-95.
8. Bhagavan HN, Chopra RK. Coenzyme Q10: absorption, tissue uptake, metabolism and pharmacokinetics. *Free radical research*. 2006;40(5):445-53.
9. Higgins JPT TJ, Chandler J, Cumpston M, Li T, Page MJ, Welch VA. *Cochrane Handbook for Systematic Reviews of Interventions version 6.0 (updated July 2019)*: Cochrane; 2019. Available from: Available from [www.training.cochrane.org/handbook](http://www.training.cochrane.org/handbook).
10. Guyatt GH, Oxman AD, Kunz R, Vist GE, Falck-Ytter Y, Schunemann HJ. What is "quality of evidence" and why is it important to clinicians? *BMJ (Clinical research ed)*. 2008;336(7651):995-8.
11. The Nordic Cochrane Centre TCC. *Review Manager (RevMan)*. Version 5.3.: Copenhagen: The Nordic Cochrane Centre, The Cochrane Collaboration; 2014.
12. Airola G, Allais G, Castagnoli Gabellari I, Rolando S, Mana O, Benedetto C. Non-pharmacological management of migraine during pregnancy. *Neurological sciences : official journal of the Italian Neurological Society and of the Italian Society of Clinical Neurophysiology*. 2010;31 Suppl 1:S63-5.
13. Bianchi A, Salomone S, Caraci F, Pizza V, Bernardini R, D'Amato CC. Role of magnesium, coenzyme Q10, riboflavin, and vitamin B12 in migraine prophylaxis. *Vitamins and hormones*. 2004;69:297-312.
14. Carotenuto M, Esposito M. Nutraceuticals safety and efficacy in migraine without aura in a population of children affected by neurofibromatosis type I. *Neurological sciences : official journal of the Italian Neurological Society and of the Italian Society of Clinical Neurophysiology*. 2013;34(11):1905-9.
15. Dalla Volta G, Carli D, Zavarise P, Ngonga G, Vollaro S. P026. Pilot study on the use of coenzyme Q10 in a group of patients with episodic migraine without aura. *Journal of headache and pain ( varpagings)*. 2015;16(no pagination).
16. Daniel O, Mauskop A. Nutraceuticals in Acute and Prophylactic Treatment of Migraine. *Current treatment options in neurology*. 2016;18(4):14.
17. Di Lorenzo C. The use of a phytotherapeutic compound containing Tanacetum Parthenium and Andrographis, in combination with CoQ10 and Riboflavin, for migraine prophylaxis: a randomized double blind versus placebo clinical trial. *Journal of headache and pain Conference: 12th european*

- 1  
2  
3 headache federation congress and the 32nd national congress of the italian society for the study of  
4 headaches Italy. 2018;19.
- 5 18. Esposito M, Carotenuto M. Ginkgolide B complex efficacy for brief prophylaxis of migraine in  
6 school-aged children: an open-label study. *Neurological sciences : official journal of the Italian*  
7 *Neurological Society and of the Italian Society of Clinical Neurophysiology*. 2011;32(1):79-81.
- 8 19. Gaul C, Danesch U, Diener H. A proprietary supplement containing riboflavin, magnesium  
9 and Q10 improves migraine symptoms in a randomized placebo-controlled double-blind trial.  
10 *Cephalalgia : an international journal of headache*. 2015;35(6 SUPPL. 1):45.
- 11 20. Rozen TD, Oshinsky ML, Gebeline CA, Bradley KC, Young WB, Shechter AL, et al. Open label  
12 trial of coenzyme Q10 as a migraine preventive. *Cephalalgia*. 2002;22(2):137-41.
- 13 21. Dahri M, Hashemilar M, Asghari-Jafarabadi M, Tarighat-Esfanjani A. Efficacy of coenzyme  
14 Q10 for the prevention of migraine in women: a randomized, double-blind, placebo-controlled  
15 study. *European Journal Of Integrative Medicine*. 2017;16:8-14.
- 16 22. Dahri M, Tarighat-Esfanjani A, Asghari-Jafarabadi M, Hashemilar M. Oral coenzyme Q10  
17 supplementation in patients with migraine: effects on clinical features and inflammatory markers.  
18 *Nutritional Neuroscience*. 2018:1-9.
- 19 23. Gaul C, Diener HC, Danesch U. Improvement of migraine symptoms with a proprietary  
20 supplement containing riboflavin, magnesium and Q10: a randomized, placebo-controlled, double-  
21 blind, multicenter trial. *Journal Of Headache And Pain*. 2015;16:516.
- 22 24. Hajhashemi P, Askari G, Khorvash F, Reza Maracy M, Nourian M. The effects of concurrent  
23 Coenzyme Q10, L-carnitine supplementation in migraine prophylaxis: A randomized, placebo-  
24 controlled, double-blind trial. *Cephalalgia*. 2019:333102418821661.
- 25 25. Nattagh-Eshivani E, Dahri M, Hashemilar M, Tarighat-Esfanjani A. The effect of Coenzyme  
26 Q10 supplementation on serum levels of lactate, pyruvate, matrix metalloproteinase 9 and nitric  
27 oxide in women with migraine. A double blind, placebo, controlled randomized clinical trial.  
28 *European Journal Of Integrative Medicine*. 2018;21:70-6.
- 29 26. Sandor PS, Di Clemente L, Coppola G, Saenger U, Fumal A, Magis D, et al. Efficacy of  
30 coenzyme Q10 in migraine prophylaxis: a randomized controlled trial. *Neurology*. 2005;64(4):713-5.
- 31 27. Lipton RB, Bigal ME, Diamond M, Freitag F, Reed ML, Stewart WF. Migraine prevalence,  
32 disease burden, and the need for preventive therapy. *Neurology*. 2007;68(5):343-9.
- 33 28. Manzoni GC, Torelli P. Epidemiology of migraine. *The Journal of Headache and Pain*.  
34 2003;4(Suppl 1):s18-s22.
- 35 29. Talebian A, Soltani B, Banafshe HR, Moosavi GA, Talebian M, Soltani S. Prophylactic effect of  
36 riboflavin on pediatric migraine: a randomized, double-blind, placebo-controlled trial. *Electron*  
37 *Physician*. 2018;10(2):6279-85.
- 38 30. Okoli GN, Rabbani R, Kashani HH, Wierzbowski AK, Neilson C, Mansouri B, et al. Vitamins and  
39 Minerals for Migraine Prophylaxis: A Systematic Review and Meta-analysis. *Can J Neurol Sci*.  
40 2019;46(2):224-33.
- 41 31. Parohan M, Sarraf P, Javanbakht MH, Ranji-Burachaloo S, Djalali M. Effect of coenzyme Q10  
42 supplementation on clinical features of migraine: a systematic review and dose-response meta-  
43 analysis of randomized controlled trials. *Nutr Neurosci*. 2019:1-8.
- 44 32. Khorvash F, Bagheri L, Ghasemi M, Ghaed-Amini A, Maracy MR. Coenzyme q10 in migraine  
45 prophylaxis: a randomized, double-blind, placebo-controlled clinical trial. *Journal of isfahan medical*  
46 *school*. 2016;33(358):1904-11.
- 47 33. Slater SK, Nelson TD, Kabbouche MA, LeCates SL, Horn P, Segers A, et al. A randomized,  
48 double-blinded, placebo-controlled, crossover, add-on study of CoEnzyme Q10 in the prevention of  
49 pediatric and adolescent migraine. *Cephalalgia*. 2011;31(8):897-905.
- 50 34. Shoeibi A, Olfati N, Soltani Sabi M, Salehi M, Mali S, Akbari Oryani M. Effectiveness of  
51 coenzyme Q10 in prophylactic treatment of migraine headache: an open-label, add-on, controlled  
52 trial. *Acta Neurologica Belgica*. 2017;117(1):103-9.
- 53  
54  
55  
56  
57  
58  
59  
60

## Supplementary file 1: DETAILED SEARCH STRATEGY

### MEDLINE search strategy

Pubmed - (migraine[Title/Abstract]) AND coenzyme q10[Title/Abstract]

MeSH data based"coenzyme Q10"[All Fields] OR coenzyme q10[Text Word]

migraine[Title/Abstract] AND q10[Title/Abstract]

migraine[Title/Abstract] AND ubiquinone[Title/Abstract]

### CENTRAL search strategy

migraine in Title Abstract Keyword AND coenzyme q10 in Title Abstract Keyword

migraine in Title Abstract Keyword AND ubiquinone in Title Abstract Keyword

migraine in Title Abstract Keyword AND q10 in Title Abstract Keyword

MeSH data based"coenzyme Q10"[All Fields] OR coenzyme q10[Text Word]

## Supplementary file 2: PRISMA FLOWCHART

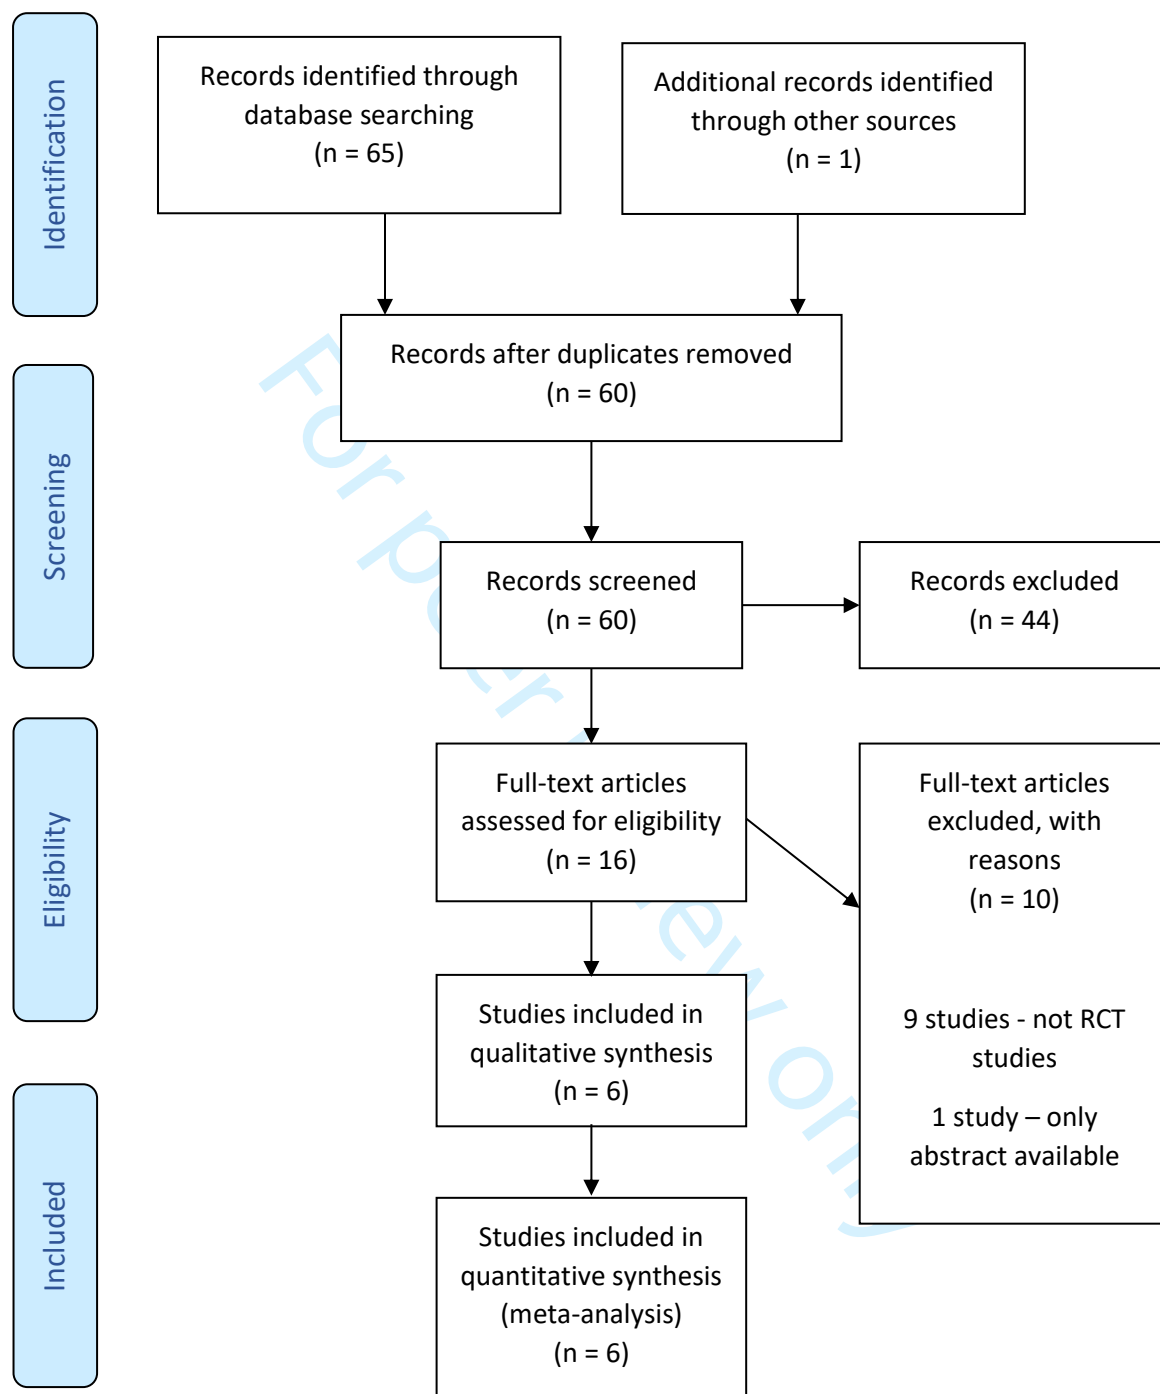

Figure 1: PRISMA Study flow diagram

Supplementary file 3: RISK OF BIAS ASSESSMENT

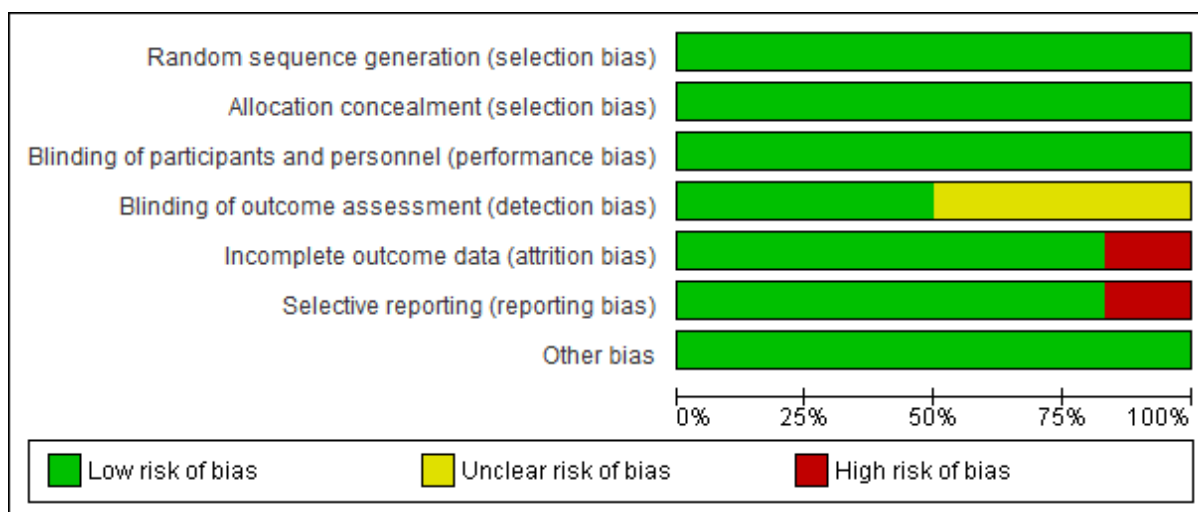

Figure 2a: Risk of bias graph: review authors' judgements about each risk of bias item presented as percentages across all included studies.

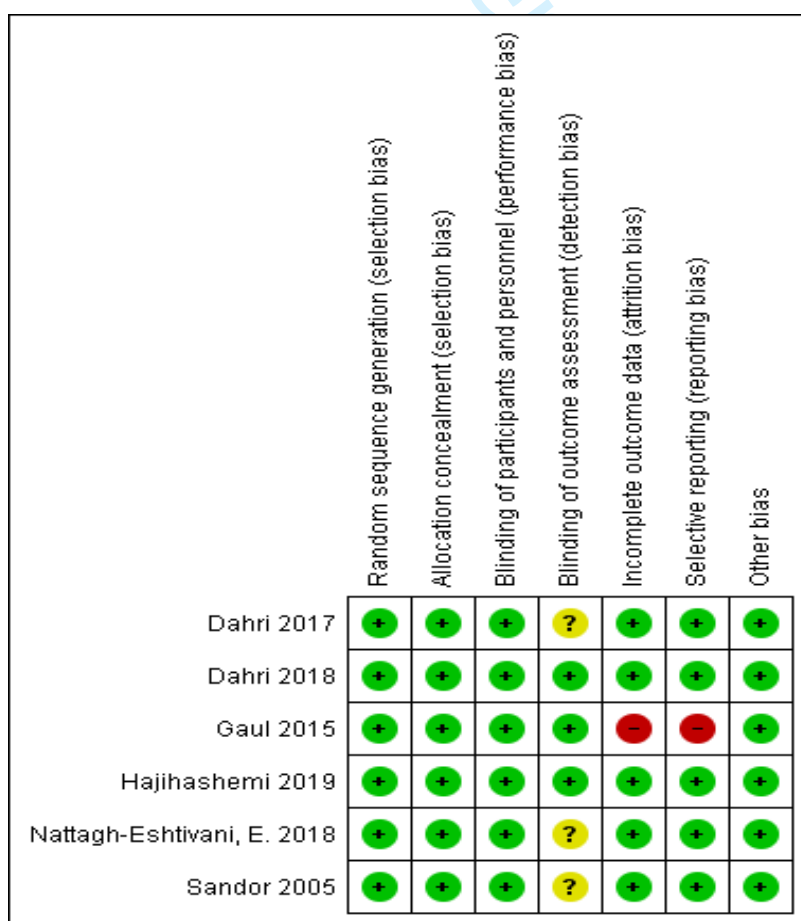

Figure 2b: Risk of bias summary: review authors' judgements about each risk of bias item for each included study.



## Supplementary file 4: FOREST PLOT OF PRIMARY OUTCOMES

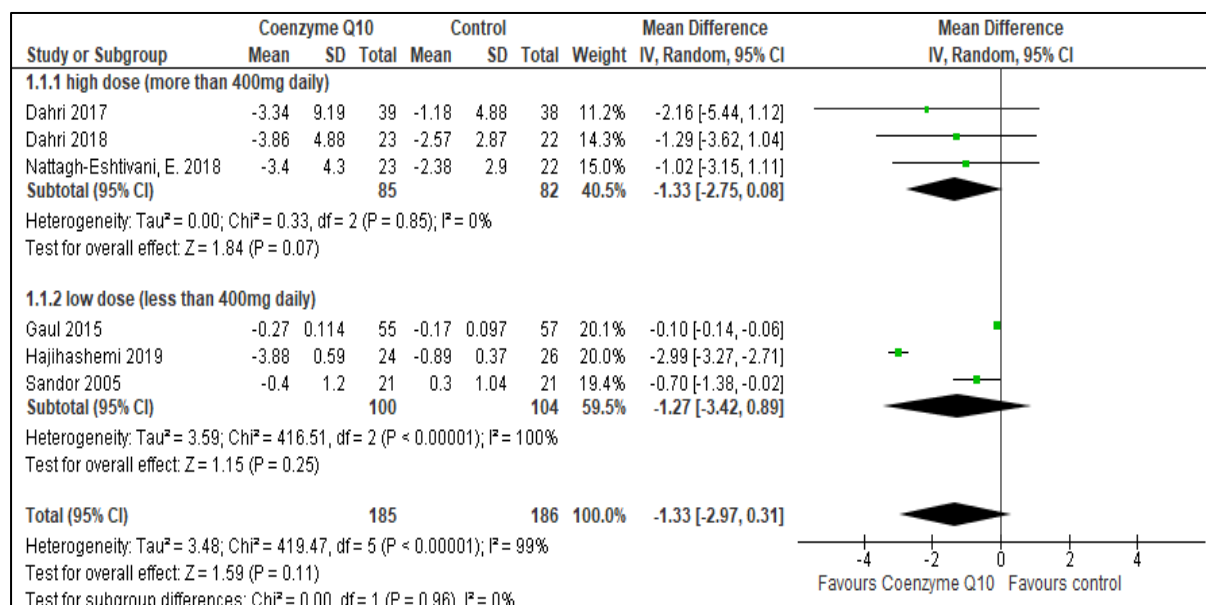

**Figure 3:** Forest plot of effects coenzyme Q10 versus control on severity of headache during attack

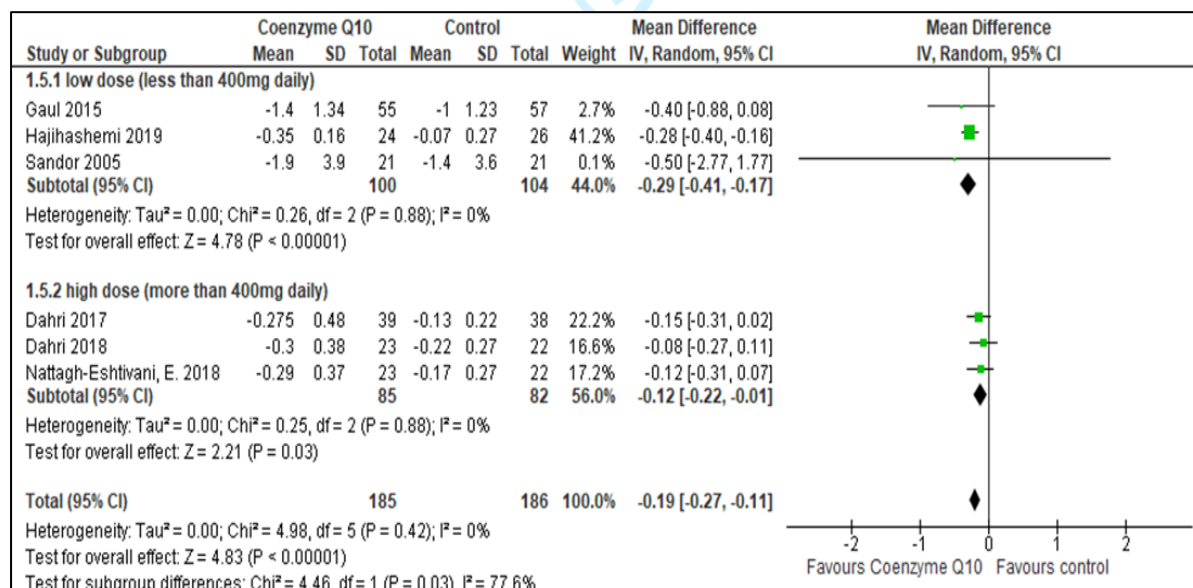

**Figure 4:** Forest plot of effects coenzyme Q10 versus control on duration of headache attacks per month

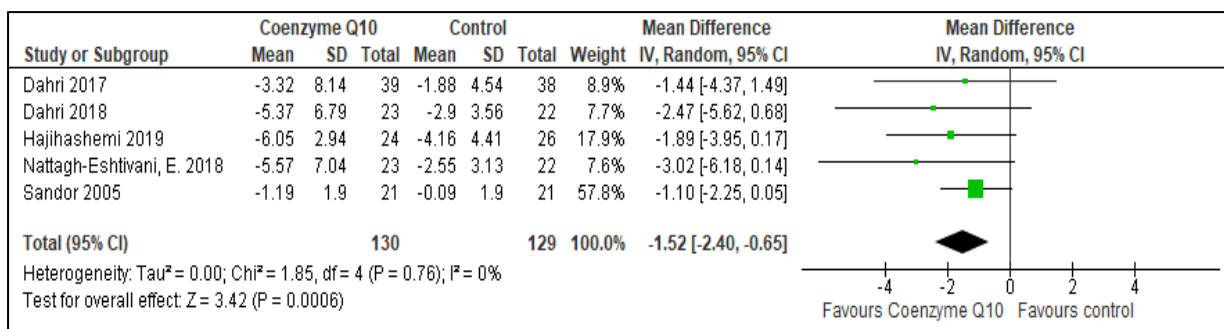

**Figure 5:** Forest plot of effects coenzyme Q10 versus control on frequency of migraine headache per month

For peer review only

## Appendix I: PRISMA Checklist

| Section/topic                      | #  | Checklist item                                                                                                                                                                                                                                                                                              | Reported on page # of manuscript file (unless otherwise indicated) |
|------------------------------------|----|-------------------------------------------------------------------------------------------------------------------------------------------------------------------------------------------------------------------------------------------------------------------------------------------------------------|--------------------------------------------------------------------|
| <b>TITLE</b>                       |    |                                                                                                                                                                                                                                                                                                             |                                                                    |
| Title                              | 1  | Identify the report as a systematic review, meta-analysis, or both.                                                                                                                                                                                                                                         | 1                                                                  |
| <b>ABSTRACT</b>                    |    |                                                                                                                                                                                                                                                                                                             |                                                                    |
| Structured summary                 | 2  | Provide a structured summary including, as applicable: background; objectives; data sources; study eligibility criteria, participants, and interventions; study appraisal and synthesis methods; results; limitations; conclusions and implications of key findings; systematic review registration number. | 3                                                                  |
| <b>INTRODUCTION</b>                |    |                                                                                                                                                                                                                                                                                                             |                                                                    |
| Rationale                          | 3  | Describe the rationale for the review in the context of what is already known.                                                                                                                                                                                                                              | 6                                                                  |
| Objectives                         | 4  | Provide an explicit statement of questions being addressed with reference to participants, interventions, comparisons, outcomes, and study design (PICOS).                                                                                                                                                  | 6                                                                  |
| <b>METHODS</b>                     |    |                                                                                                                                                                                                                                                                                                             |                                                                    |
| Protocol and registration          | 5  | Indicate if a review protocol exists, if and where it can be accessed (e.g., Web address), and, if available, provide registration information including registration number.                                                                                                                               | 6                                                                  |
| Eligibility criteria               | 6  | Specify study characteristics (e.g., PICOS, length of follow-up) and report characteristics (e.g., years considered, language, publication status) used as criteria for eligibility, giving rationale.                                                                                                      | 7                                                                  |
| Information sources                | 7  | Describe all information sources (e.g., databases with dates of coverage, contact with study authors to identify additional studies) in the search and date last searched.                                                                                                                                  | 7                                                                  |
| Search                             | 8  | Present full electronic search strategy for at least one database, including any limits used, such that it could be repeated.                                                                                                                                                                               | 7, Supplementary file 1                                            |
| Study selection                    | 9  | State the process for selecting studies (i.e., screening, eligibility, included in systematic review, and, if applicable, included in the meta-analysis).                                                                                                                                                   | 7-8, Supplementary file 2: Figure1                                 |
| Data collection process            | 10 | Describe method of data extraction from reports (e.g., piloted forms, independently, in duplicate) and any processes for obtaining and confirming data from investigators.                                                                                                                                  | 8                                                                  |
| Data items                         | 11 | List and define all variables for which data were sought (e.g., PICOS, funding sources) and any assumptions and simplifications made.                                                                                                                                                                       | 8-9                                                                |
| Risk of bias in individual studies | 12 | Describe methods used for assessing risk of bias of individual studies (including specification of whether this was done at the study or outcome level), and how this information is to be used in any data synthesis.                                                                                      | 8                                                                  |
| Summary measures                   | 13 | State the principal summary measures (e.g., risk ratio, difference in means).                                                                                                                                                                                                                               | 8-9                                                                |

| Section/topic                 | #  | Checklist item                                                                                                                                                                                           | Reported on page # of manuscript file (unless otherwise indicated) |
|-------------------------------|----|----------------------------------------------------------------------------------------------------------------------------------------------------------------------------------------------------------|--------------------------------------------------------------------|
| Synthesis of results          | 14 | Describe the methods of handling data and combining results of studies, if done, including measures of consistency (e.g., $I^2$ ) for each meta-analysis.                                                | 8-9                                                                |
| Risk of bias across studies   | 15 | Specify any assessment of risk of bias that may affect the cumulative evidence (e.g., publication bias, selective reporting within studies).                                                             | 8                                                                  |
| Additional analyses           | 16 | Describe methods of additional analyses (e.g., sensitivity or subgroup analyses, meta-regression), if done, indicating which were pre-specified.                                                         | 9                                                                  |
| <b>RESULTS</b>                |    |                                                                                                                                                                                                          |                                                                    |
| Study selection               | 17 | Give numbers of studies screened, assessed for eligibility, and included in the review, with reasons for exclusions at each stage, ideally with a flow diagram.                                          | 9, Supplementary file 2 (figure 1)                                 |
| Study characteristics         | 18 | For each study, present characteristics for which data were extracted (e.g., study size, PICOS, follow-up period) and provide the citations.                                                             | 10, Table 1                                                        |
| Risk of bias within studies   | 19 | Present data on risk of bias of each study and, if available, any outcome level assessment (see item 12).                                                                                                | 12, Supplementary file 3 (figure 2a,2b)                            |
| Results of individual studies | 20 | For all outcomes considered (benefits or harms), present, for each study: (a) simple summary data for each intervention group (b) effect estimates and confidence intervals, ideally with a forest plot. | 12-13, Supplementary file 4 (figure 4, 5,6)                        |
| Synthesis of results          | 21 | Present results of each meta-analysis done, including confidence intervals and measures of consistency.                                                                                                  | 13-14                                                              |
| Risk of bias across studies   | 22 | Present results of any assessment of risk of bias across studies (see Item 15).                                                                                                                          | 12-13, Supplementary file 3 (figure 2a,2b)                         |
| Additional analysis           | 23 | Give results of additional analyses, if done (e.g., sensitivity or subgroup analyses, meta-regression [see Item 16]).                                                                                    | 13-14                                                              |
| <b>DISCUSSION</b>             |    |                                                                                                                                                                                                          |                                                                    |
| Summary of evidence           | 24 | Summarize the main findings including the strength of evidence for each main outcome; consider their relevance to key groups (e.g., healthcare providers, users, and policy makers).                     | 15-17, Table 2                                                     |
| Limitations                   | 25 | Discuss limitations at study and outcome level (e.g., risk of bias), and at review-level (e.g., incomplete retrieval of identified research, reporting bias).                                            | 16                                                                 |
| Conclusions                   | 26 | Provide a general interpretation of the results in the context of other evidence, and implications for future research.                                                                                  | 18-19                                                              |
| <b>FUNDING</b>                |    |                                                                                                                                                                                                          |                                                                    |
| Funding                       | 27 | Describe sources of funding for the systematic review and other support (e.g., supply of data); role of funders for the systematic review.                                                               | 20                                                                 |

# BMJ Open

## COENZYME Q10 SUPPLEMENTATION FOR PROPHYLAXIS IN ADULT PATIENTS WITH MIGRAINE –A META-ANALYSIS

|                                 |                                                                                                                                                                                                                                                                                                                                                                                                        |
|---------------------------------|--------------------------------------------------------------------------------------------------------------------------------------------------------------------------------------------------------------------------------------------------------------------------------------------------------------------------------------------------------------------------------------------------------|
| Journal:                        | <i>BMJ Open</i>                                                                                                                                                                                                                                                                                                                                                                                        |
| Manuscript ID                   | bmjopen-2020-039358.R2                                                                                                                                                                                                                                                                                                                                                                                 |
| Article Type:                   | Original research                                                                                                                                                                                                                                                                                                                                                                                      |
| Date Submitted by the Author:   | 25-Nov-2020                                                                                                                                                                                                                                                                                                                                                                                            |
| Complete List of Authors:       | Sazali, Suhairul; Universiti Sains Malaysia - Kampus Kesihatan, Department of Family Medicine<br>Badrin, Salziyan; Universiti Sains Malaysia - Kampus Kesihatan, Department of Family Medicine<br>Norhayati, Mohd Noor; Universiti Sains Malaysia - Kampus Kesihatan, Department of Family Medicine<br>Idris, Nur Suhaila; Universiti Sains Malaysia - Kampus Kesihatan, Department of Family Medicine |
| <b>Primary Subject Heading</b>: | Neurology                                                                                                                                                                                                                                                                                                                                                                                              |
| Secondary Subject Heading:      | Complementary medicine                                                                                                                                                                                                                                                                                                                                                                                 |
| Keywords:                       | Migraine < NEUROLOGY, COMPLEMENTARY MEDICINE, Neurology < INTERNAL MEDICINE                                                                                                                                                                                                                                                                                                                            |
|                                 |                                                                                                                                                                                                                                                                                                                                                                                                        |

SCHOLARONE™  
Manuscripts



I, the Submitting Author has the right to grant and does grant on behalf of all authors of the Work (as defined in the below author licence), an exclusive licence and/or a non-exclusive licence for contributions from authors who are: i) UK Crown employees; ii) where BMJ has agreed a CC-BY licence shall apply, and/or iii) in accordance with the terms applicable for US Federal Government officers or employees acting as part of their official duties; on a worldwide, perpetual, irrevocable, royalty-free basis to BMJ Publishing Group Ltd ("BMJ") its licensees and where the relevant Journal is co-owned by BMJ to the co-owners of the Journal, to publish the Work in this journal and any other BMJ products and to exploit all rights, as set out in our [licence](#).

The Submitting Author accepts and understands that any supply made under these terms is made by BMJ to the Submitting Author unless you are acting as an employee on behalf of your employer or a postgraduate student of an affiliated institution which is paying any applicable article publishing charge ("APC") for Open Access articles. Where the Submitting Author wishes to make the Work available on an Open Access basis (and intends to pay the relevant APC), the terms of reuse of such Open Access shall be governed by a Creative Commons licence – details of these licences and which [Creative Commons](#) licence will apply to this Work are set out in our licence referred to above.

Other than as permitted in any relevant BMJ Author's Self Archiving Policies, I confirm this Work has not been accepted for publication elsewhere, is not being considered for publication elsewhere and does not duplicate material already published. I confirm all authors consent to publication of this Work and authorise the granting of this licence.

1  
2  
3 **Title: COENZYME Q10 SUPPLEMENTATION FOR PROPHYLAXIS IN ADULT**  
4  
5 **PATIENTS WITH MIGRAINE –A META-ANALYSIS**  
6  
7

8  
9 Suhairul Sazali<sup>1</sup>, Salziyan Badrin<sup>1</sup>, Norhayati Mohd Noor<sup>1</sup>, Nur Suhaila Idris<sup>1</sup>  
10

11 <sup>1</sup> Department of Family Medicine, School of Medical Sciences, Universiti Sains Malaysia,  
12 16150 Kubang Kerian, Kelantan, Malaysia  
13

14  
15 **Authors:**

16 1. Suhairul Sazali

17 MD

18 Department of Family Medicine

19 School of Medical Sciences

20 Universiti Sains Malaysia

21 16150 Kubang Kerian

22 Kelantan, Malaysia

23 Email: suhairul\_sazali@yahoo.com  
24  
25

26 2. Salziyan Badrin (**Corresponding author**)

27 MD, MMed (Family Medicine)

28 Department of Family Medicine

29 School of Medical Sciences

30 Universiti Sains Malaysia

31 16150 Kubang Kerian

32 Kelantan, Malaysia

33 Email: salziyan@usm.my

34 Telephone number: +609-7676608

35 Fax number: +609-7653370  
36  
37  
38

39 3. Norhayati Mohd Noor

40 MBBS, M.Comm.Med, Ph.D

41 Department of Family Medicine

42 School of Medical Sciences

43 Universiti Sains Malaysia

44 16150 Kubang Kerian

45 Kelantan, Malaysia

46 Email: hayatikk@usm.my  
47  
48

49 4. Nur Suhaila Idris

50 MD, MMed (Family Medicine)

51 Department of Family Medicine

52 School of Medical Sciences

53 Universiti Sains Malaysia

54 16150 Kubang Kerian

55 Kelantan, Malaysia

56 Email: nursuhaila@usm.my  
57  
58  
59  
60

1  
2  
3  
4  
5  
6  
7  
8  
9  
10  
11  
12  
13  
14  
15  
16  
17  
18  
19  
20  
21  
22  
23  
24  
25  
26  
27  
28  
29  
30  
31  
32  
33  
34  
35  
36  
37  
38  
39  
40  
41  
42  
43  
44  
45  
46  
47  
48  
49  
50  
51  
52  
53  
54  
55  
56  
57  
58  
59  
60

**Keyword:** Coenzyme Q10, Migraine, Supplementation

**Word count:** 3492 words with exclusion of abstract, table and references.

For peer review only



## Abstract

**Objective** To determine the effects of coenzyme Q10 (CoQ10) for reduction the severity, frequency of migraine attacks and duration of headache in adult patients with migraine.

**Design** Systematic review and meta- analysis.

**Data sources** Cochrane Central Register of Controlled Trials, CENTRAL, MEDLINE, EMBASE, Cumulative Index to Nursing and Allied Health Literature (CINAHL) and Psychological Information Database (PsycINFO) from inception till December 2019.

**Study selection** All randomized control trials (RCTs) comparing CoQ10 with placebo or used as an adjunct treatment included in this meta-analysis. Crossover designs and controlled clinical trials (CCT) were excluded.

**Data synthesis** Heterogeneity at face value by comparing populations, settings, interventions and outcomes were measured and statistical heterogeneity was assessed by means of the  $I^2$  statistic. The treatment effect for dichotomous outcomes were using risk ratios (RRs) and risk difference (RD), and for continuous outcomes, mean differences (MDs) or standardized mean difference (SMD); both with 95% confidence intervals (CIs) were used. Subgroup analyses were carried out for dosage of CoQ10 and if CoQ10 combined with another supplementation. Sensitivity analysis was used to investigate the impact risk of bias for sequence generation and allocation concealment of included studies.

**Results** Six studies with a total of 371 participants were included in meta-analysis. There is no statistically significant reduction in severity of migraine headache with CoQ10 supplementation. CoQ10 supplementation reduced the duration of headache attacks compared to the control group (mean difference -0.19, 95% CI -0.27 to -0.11; random effects;  $I^2$  statistic = 0%;  $P < 0.00001$ ). CoQ10 usage reduced the frequency of migraine headache compared to

1  
2  
3 the control group (MD -1.52, 95% CI -2.40 to -0.65; random effects; I<sup>2</sup> statistic = 0%; P =  
4  
5 <0.001).  
6  
7

8 **Conclusion** CoQ10 appears to have beneficial effects in reducing duration and frequency of  
9  
10 migraine attack.  
11  
12

13 **PROSPERO registration number** CRD42019126127  
14  
15  
16  
17  
18  
19  
20  
21  
22  
23  
24  
25  
26  
27  
28  
29  
30  
31  
32  
33  
34  
35  
36  
37  
38  
39  
40  
41  
42  
43  
44  
45  
46  
47  
48  
49  
50  
51  
52  
53  
54  
55  
56  
57  
58  
59  
60

For peer review only

## Strengths and limitations of this study

### Strengths

- The meta-analysis included randomized controlled trials only.
- The overall level of evidences assessed using the GRADE approach.
- Subgroup analysis and potential sources of heterogeneity explored.

### Limitation

- Small numbers of the included studies.

## Introduction

Migraine is an episodic disorder, the centrepiece of which is a severe headache generally associated with nausea and/or light and sound sensitivity. Migraine is a common disorder that affects up to 12% of the general population(1). Migraine is a debilitating brain disorder with serious social and financial consequences for the individual and the society(2). Migraine medications usually aim to reduce the frequency and intensity of headache attacks and few of the medications acts as preventive medication.

Low levels of the micronutrients such as riboflavin, magnesium and coenzyme in plasma and in the brain are reported in migraine patients(3). A deficit of these nutrients is thought to cause the migraine attacks. The cortical spreading depression is hypothesized to cause the elevation level of MMP-9 is associated with blood-brain barrier dysfunction and inflammation of nerves exacerbates migraine attacks(4, 5). The CoQ10, also known as ubiquinone, is one of the most important antioxidants that acts against hydrogen peroxide and other inflammatory markers of migraine along with reduction of expression cytokines and MMPs(6). CoQ10 is a vitamin-like compound, which can be synthesized by the body from phenylalanine and tyrosine. It has many roles in the body, especially in mitochondria and is thought to play a role in migraines, but the link is unknown(3). It acts as an important factor in the electron transport chain of mitochondria, which helps in energy metabolism and oxygen utilization in the brain and muscles(7). CoQ10 can be administered orally or parenterally. Peak blood levels occur 5–10 hours after oral administration. Elimination half-life is 33.19 hours(8). This meta-analysis aimed to determine the effectiveness of CoQ10 supplements as a prophylaxis for migraine in adult patients. The protocol for this meta-analysis is registered in International Prospective Register of Systematic review (PROSPERO) with trial number CRD42019126127, available from <https://www.crd.york.ac.uk/prospere>.

## Methods

Only randomized control trials (RCTs) comparing CoQ10 with placebo or as an adjunct treatment were accepted in the meta-analysis. All blinded and open-label studies were included in this meta-analysis. Crossover designs and controlled clinical trials (CCT) were excluded. We included the adult participants aged 18 till 50 years old of either sex or of any ethnicity. Supplementation with oral CoQ10 as monotherapy or in combinations with other dietary products, regardless in duration of therapy were included in the meta-analysis. Participants with migraine diagnosed by neurologist or physician according to either International Classification of Headache Disorder II (ICHD-II) or International Headache Society criteria (IHS) were included criteria for the meta-analysis. The primary outcomes and secondary outcomes in the trials that have been followed up for a minimum of 6 weeks after giving the interventions included in the meta-analysis.

### *Identification of study*

We searched the Cochrane Central Register of Controlled Trials, CENTRAL, MEDLINE, EMBASE, Cumulative Index to Nursing and Allied Health Literature (CINAHL) and Psychological Information Database (PsycINFO) from inception till December 2019. We used the search terms “coenzyme Q10”, “ubiquinone” and “migraine” with Boolean operators of AND and OR (Refer Supplementary file 1). We checked the reference list of identifying RCTs and review articles to find unpublished trials or trials not identified by electronic searches. We contacted the experts in the field and pharmaceutical companies which market CoQ10 to identify unpublished trials. We searched for ongoing trials through the World Health Organization (WHO) International Clinical Trials Registry Platform (ICTRP), <https://www.who.int/ictrp/en/> and [www.clinicaltrials.gov](http://www.clinicaltrials.gov). We excluded trials published other than the English language. We scanned the titles and abstracts from the searches and obtain

1  
2  
3 full-text articles when they appear to meet the eligibility criteria, or when there was insufficient  
4 information to assess the eligibility. We assessed the eligibility of the trials independently and  
5  
6 documented all the reasons for exclusion. We resolved any disagreements between the review  
7  
8 authors by discussion. We contacted the authors if clarification is needed.  
9  
10

### 11 12 13 ***Data Collection and analysis*** 14

15  
16 Three authors extracted data independently. We extracted data on the dosage and frequency of  
17  
18 CoQ10 supplementation, criteria for diagnosis of migraine, age, sex, ethnicity, and the  
19  
20 outcomes of each trials which include severity of the headache attacks using the visual  
21  
22 analogue scale (VAS), duration of headache in migraine attacks in hour per month, frequency  
23  
24 of migraine attacks in a month, numbers of days with nausea, numbers of analgesic used during  
25  
26 headache attacks, numbers of acute migraine medication used, quality of life and adverse  
27  
28 effects of CoQ10 using data extraction form. Disagreements between the review authors were  
29  
30 resolved by discussion with the fourth author.  
31  
32  
33

34  
35 The Cochrane Collaboration's risk-of-bias tools was used to assess the risk of bias in of the  
36  
37 included studies(9). Three authors assessed each trial's risk of bias independently. We assessed  
38  
39 selection bias (randomisation, allocation concealment), performance bias (blinding of  
40  
41 participant and health personnel), detection bias (blinding of outcome assessment), attrition  
42  
43 bias (incomplete outcome data), reporting bias (selective reporting) and other bias (recall bias,  
44  
45 transfer bias and etc). We resolved any disagreements by the discussion with the fourth author.  
46  
47  
48 We assessed the quality of evidence for primary and secondary outcomes, according to the  
49  
50 GRADE methodology for risk of bias, inconsistency, indirectness, imprecision, and publication  
51  
52 bias; classified as very low, low, moderate, or high(10).  
53  
54  
55

56 We analysed data using Review Manager 5.3 software(11). We used random-effects model to  
57  
58 pool data. We assessed the presence of heterogeneity in two steps. First, we assessed obvious  
59  
60

1  
2  
3 heterogeneity at face value by comparing populations, settings, interventions and outcomes.  
4  
5 Then, we assessed statistical heterogeneity by means of the  $I^2$  statistic. We interpreted the  
6  
7 heterogeneity as; 0% to 40% represent might not be important, 30% to 60% may represent  
8  
9 moderate heterogeneity, 50% to 90% may represent substantial heterogeneity and 75% to 100%  
10  
11 would be considerable heterogeneity(9).  
12  
13

14  
15 We measured the treatment effect using risk ratios (RRs) and risk difference (RD) for  
16  
17 dichotomous outcomes and mean differences (MDs) or standardized mean difference (SMD);  
18  
19 both with 95% confidence intervals (CIs) for continuous outcomes. We conducted subgroup  
20  
21 analyses based on the different dosage of CoQ10 and if CoQ10 is combined with another  
22  
23 supplementation. We explored the potential sources of heterogeneity when it is present. We  
24  
25 checked all included trials for unit of analysis errors. Unit of analysis errors can occur when  
26  
27 trials randomize participants to intervention or control groups in clusters, but analysed the  
28  
29 results using the total number of individual participants. We adjusted results from trials showed  
30  
31 unit of analysis errors based on the mean cluster size and intraclass correlation coefficient(9).  
32  
33 We contacted the original trial's authors to request missing or inadequately reported data. We  
34  
35 performed analyses on the available data if missing data are not available. We performed  
36  
37 sensitivity analysis to investigate the impact of risk of bias for sequence generation and  
38  
39 allocation concealment of included studies.  
40  
41  
42  
43  
44  
45

## 46 **Results**

47  
48 We retrieved 65 records from the search of the electronic databases and one record from other  
49  
50 sources (Supplementary file 2, Figure 1). We screened a total of 60 records. We reviewed full  
51  
52 text of 16 studies and excluded another 10 studies because all of the studies were non-  
53  
54 randomized controlled trials(3, 12-20). Therefore, we included only six studies in this review.  
55  
56  
57  
58  
59  
60

1  
2  
3 We included six studies with a total of 371 participants(21-26). In all the trials, diagnosis of  
4 migraine was done based on International Headache Society criteria. Two out of six studies  
5  
6 (and one study that contributed to the primary outcome) declared funding from drug  
7  
8 manufacturers(23, 26). Two out of six studies were multicentre trials in high-income  
9  
10 countries(23, 26). All included trials used International Headache Society criteria (IHS) for  
11  
12 diagnosis of migraine. Three studies involved a total of 167 female gender only as  
13  
14 participants(21, 22, 25) and another three studies involved on both genders and a total of 204  
15  
16 participants(23, 24, 26). All the participants in the included studies were randomised into  
17  
18 intervention and control groups. Three studies reported using CoQ10 with other elements such  
19  
20 as multivitamin(23), L-carnitine(24) and preventive medication in the intervention group(21).  
21  
22 One study used the medication in liquid formulation of water dispersed into nanoparticles (26),  
23  
24 five studies used the medication in a capsule formulation(21-25). Different dosages of CoQ10  
25  
26 were administered in the studies: minimum of 30 mg per day(24), 300 mg per day(26), 400 mg  
27  
28 per day(22), 600 mg per day(23), and 800 mg per day(21, 25). All six trials excluded any  
29  
30 participants who on migraine preventive drugs in the last six months, who have history of using  
31  
32 CoQ10 or other antioxidants supplementation for at least three months prior to the  
33  
34 enrolment(21-26). One trial also excluded participants who failed to respond to the usage of  
35  
36 more than two different prophylactic agents in the past or any patients who were resistant to  
37  
38 all acute migraine drugs(23). All six included studies used placebo(21-26) and there was only  
39  
40 one trial added the preventive migraine medication to the placebo(21); however, the preventive  
41  
42 medication was used for both the intervention and control groups in this trial(21). Duration of  
43  
44 CoQ10 treatment differs among the trials and was reported at 8 weeks in one study(24), and at  
45  
46 3 months in five other studies(21-23, 25, 26). Table 1 summarised the characteristics of the  
47  
48 included trials.  
49  
50  
51  
52  
53  
54  
55  
56  
57  
58  
59  
60



Table 1: Characteristics of included trials in the meta-analysis

| Studies                   | Size, n | Mean Age, years | Female, % | BMI, kg/m <sup>2</sup> | Interventions                                                                                                   | CoQ10 maximum dose per day |
|---------------------------|---------|-----------------|-----------|------------------------|-----------------------------------------------------------------------------------------------------------------|----------------------------|
| Sandor, 2005              | 42      | 38.65           | 80.9      | Not mention            | <b>Intervention:</b><br>CoQ10 liquid formulation of water dispersed nanoparticles<br><b>Control:</b> Placebo    | 100 mg                     |
| Nattagh - Eshtivani, 2018 | 45      | 32.7            | 100.0     | 25.16                  | <b>Intervention:</b><br>CoQ10 capsule<br><b>Control:</b> Placebo                                                | 800mg                      |
| Dahri, 2018               | 45      | 32.36           | 100.0     | 25.55                  | <b>Intervention:</b><br>CoQ10 capsule<br><b>Control:</b> Placebo                                                | 400mg                      |
| Hajihashemi, 2019         | 50      | 32.44           | 87.5      | 24.47                  | <b>Intervention:</b><br>CoQ10 capsule and L-carnitine<br><b>Control:</b> Placebo                                | 30mg                       |
| Gaul, 2015                | 112     | 38.4            | 86.6      | 38.4                   | <b>Intervention:</b><br>CoQ10 with multivitamins combination<br><b>Control:</b> Placebo                         | 600mg                      |
| Dahri, 2017               | 77      | 33.71           | 100.0     | 25.43                  | <b>Intervention:</b><br>CoQ10 capsule plus preventive drugs<br><b>Control:</b><br>Placebo plus preventive drugs | 400mg                      |

1  
2  
3 All six included trials followed-up the participants for a minimum of six weeks(21-26). Six  
4 studies were included in analyses of the primary outcomes(21-26). We also analysed according  
5 to subgroup by dosage of more and less than 400 mg of CoQ10. Secondary outcomes reported  
6 in the three trials(21, 23, 26). One study reported using several questionnaires for assessing  
7 quality of life affected by migraine(21), which were headache impact test (HIT-6) and migraine  
8 specific quality of life (MSQ) questionnaires to assess wellbeing and daily functioning;  
9 meanwhile migraine disability assessment (MIDAS) questionnaire to assess disability caused  
10 by migraine. The HIT-6 used scoring of 36–49 with higher scores indicate more severe effect  
11 of migraine, the MSQ reported the scores between zero and 100 with higher scores indicate  
12 better quality of life and the MIDAS reported the scores between zero and 35 with higher scores  
13 indicate severe disability(21). We excluded 10 studies and all of the studies are non-  
14 randomized controlled trials(3, 12-20).

### 31 ***Risk of bias***

32  
33 Assessment risk of bias is shown in Figure 2a and Figure 2b (Refer Supplementary file 3,  
34 Figure 2a and Figure 2b). The proportion of studies assessed as low, high or unclear risk of  
35 bias for each risk of bias domain is presented in Figure 2a (Refer Supplementary file 3, Figure  
36 2a). Detection bias domain had 50% of low risk with attrition and reporting bias domains  
37 around 80% of low risk. The risk of bias summary for individual studies is showed in Figure  
38 2b (Refer Supplementary file 3, Figure 2b). Three studies had unclear risk for detection bias  
39 (21, 25, 26) and for attrition and reporting bias, only one trial had high risk of bias(23).

40  
41 All six studies described the method of randomisation used and randomised the participants  
42 according to block randomization(21-26). Allocation concealment was mentioned in all six  
43 included studies(21-26). All six studies mentioned about blinding the personnel and the  
44 participants(21-26). All six studies had less than 20% lost to follow-up and the reasons such as  
45  
46  
47  
48  
49  
50  
51  
52  
53  
54  
55  
56  
57  
58  
59  
60

1  
2  
3 major protocol violation(23), refused to continue the study(25, 26), failed to return to clinic(21,  
4  
5 22), pregnancy(21, 22, 24) and failed to keep diary(21, 22) and there were balanced between  
6  
7 both groups. Only one study carried out an intention-to-treat analysis in which the participants  
8  
9 were analysed according to the groups that they were initially assigned(21). All six studies  
10  
11 reported the outcomes as specified in their methods section(21-26). We detected no other  
12  
13 potential sources of bias.  
14  
15

### 16 17 18 ***Effects of interventions***

19  
20 All six studies measured the primary outcomes and assessed at three months post  
21  
22 intervention(21-26). Three studies measured the secondary outcomes(21, 23, 26). Three studies  
23  
24 did not state on the assessment of outcomes(21, 25, 26).  
25  
26

### 27 28 ***Primary outcomes***

29  
30 All six included studies reported severity of headache during migraine attack using the visual  
31  
32 analogue scale (VAS) after taking CoQ10 for at least six weeks(21-26). The meta-analysis  
33  
34 found no significant reduction in severity of headache with CoQ10 (MD -1.33, 95% CI: -2.97  
35  
36 to 0.31; I<sup>2</sup> statistic = 99%; P = 0.110; 6 trials; 371 participants) (Refer Supplementary file 3,  
37  
38 Figure 3). With more than 400 mg (MD -1.33, 95% CI -2.75 to 0.08, random effects; I<sup>2</sup> statistic  
39  
40 = 0%; P = 0.07; 3 trials; 167 participants) or less than 400 mg per day of CoQ10 (MD -1.27;  
41  
42 95% CI -3.42 to 0.89; random effects; I<sup>2</sup> statistic = 100%; P = 0.25; 3 trials; 204 participants),  
43  
44 there is no difference in the severity of headache compared to the control group.  
45  
46  
47

48  
49 All six studies reported on the duration of headache attacks in hour per month(21-26). There  
50  
51 was significant reduction of duration of headache attacks with CoQ10 as compared to the  
52  
53 control group (MD -0.19 hours, 95% CI -0.27 to -0.11; random effects; I<sup>2</sup> statistic = 0%; P <  
54  
55 0.00001; 6 trials, 371 participants) (Refer Supplementary file 3, Figure 4).  
56  
57  
58  
59  
60

1  
2  
3 Five studies reported on the frequency of migraine headache attack per month(21, 22, 24-26).  
4  
5 There was significant reduction in the frequency of migraine headache with the CoQ10 as  
6  
7 compared to the control group (MD -1.52 times per month, 95% CI -2.40 to -0.65; random  
8  
9 effects; I<sup>2</sup> statistic = 0%; P = <0.001; 5 trials, 259 participants) (Refer Supplementary file 3,  
10  
11 Figure 5).  
12  
13

14  
15 *a) Secondary outcomes*  
16

17  
18 One study reported on the number of days with nausea due to migraine headache during the  
19  
20 study period(26). The CoQ10 supplementation reduced the number of days with nausea due to  
21  
22 migraine headache (MD -1.70; 95% CI -2.92 to -0.48; P = 0.006; 1 trial, 42 participants). No  
23  
24 other study reported on this outcome. The same study reported the number of acute migraine  
25  
26 medications usage during the study period(26). The CoQ10 supplementation reduced the  
27  
28 number of acute migraine medications usage (MD 0.02; 95% CI -0.42 to 0.46; P = 0.91; 1  
29  
30 trial, 42 participants)(26).  
31  
32  
33

34  
35 Only one trial measured the quality of life among patients with migraine headache(21). Three  
36  
37 types of questionnaire including Migraine-specific quality of life (MSQ), The Headache Impact  
38  
39 Test (HIT-6) score and Migraine Disability Assessment (MIDAS) score were used to measure  
40  
41 the impact of the treatment on migraine headache on quality of life(21). Migraine-specific  
42  
43 quality of life (MSQ) questionnaire reported on role restrictive, role preventive and emotional  
44  
45 functioning. There were no significant improvements in MSQ questionnaire on role restrictive  
46  
47 (MD 17.85; 95% CI 9.59 to 26.11; P < 0.0001; 1 trial, 77 participants), role preventive (MD  
48  
49 17.16; 95% CI 8.75 to 25.57; P < 0.0001; 1 trial, 77 participants) and emotional functioning  
50  
51 (MD 16.68, 95% CI 6.70 to 26.66; P = 0.001; 1 trial, 77 participants) with the CoQ10  
52  
53 supplementation. The CoQ10 supplementation showed improvement in The Headache Impact  
54  
55 Test (HIT-6) score (MD -4.29; 95% CI -7.19 to -1.39; P = 0.004; 1 trial: 77 participants) and  
56  
57  
58  
59  
60

1  
2  
3 improvement in Migraine Disability Assessment (MIDAS) score (MD -6.00; 95% CI -9.93 to  
4 -2.07; P = 0.003; 1 trial: 77 participants). One trial reported on the adverse effects outcome on  
5 diarrhoea (OR 4.44; 95% CI 0.90 to 21.79; P = 0.07) and chromaturia (OR 19.45; 95% CI 1.10  
6 to 344.70; P = 0.04)(23) and they not different in the CoQ10 group.  
7  
8  
9  
10  
11  
12

## 13 **DISCUSSION**

### 14 15 16 **Summary of main results**

17  
18  
19 This review was designed to include all RCTs addressing the effectiveness of CoQ10 as one of  
20 the alternative medications for migraine prophylaxis. There was significant reduction in the  
21 duration by 0.19 hours of headache during attack per month and reduction in the frequency of  
22 migraine by 1.52 times per month. Meanwhile, there was no significant reduction in severity  
23 of headache during attack even by subgroup analysis according to the different dosages of the  
24 CoQ10. Nausea event caused by migraine improved with CoQ10 but there was limited in the  
25 number of the trials. Report on adverse events was limited to the minor side effects, which  
26 include episodes of diarrhoea and chromaturia and showed no difference with CoQ10.  
27  
28  
29  
30  
31  
32  
33  
34  
35  
36  
37  
38

### 39 **Overall completeness and applicability of evidence**

40  
41 We performed a comprehensive and extensive literature review to assess the effectiveness of  
42 CoQ10 supplement as prevention for migraine. The numbers of female participants higher than  
43 males in all of the included studies as the highest population diagnosed with migraine is  
44 female(27, 28). On this review, we limited the participants to adult population because there  
45 was limited number of studies done in paediatric population and a few of the studies done  
46 involved other supplements such as riboflavin in paediatric population(29). All the included  
47 studies had small number of participants and this limit the applicability of CoQ10 thus the  
48 larger samples size is needed for a better result. The information on adverse events came from  
49  
50  
51  
52  
53  
54  
55  
56  
57  
58  
59  
60

1  
2  
3 only one trial which are diarrhoea and chromaturia. There is limited information from the trials  
4  
5 on other serious adverse events.  
6  
7

### 8 **Quality of the evidence**

9  
10  
11 Generally, there were low risk of bias in most of the included studies in the domains. There  
12  
13 was no evidence of selective reporting bias in all included trials. Although there was one study  
14  
15 with high bias, the other studies had complete protocols. This meta-analysis found that there  
16  
17 were a few of the studies has unclear risk of bias on blinding of the outcome assessment which  
18  
19 can lead to the treatment effect bias in the original study and the subsequent review. The risk  
20  
21 of attrition bias was present in one trial. Attrition bias in one study is due to high proportion of  
22  
23 sample excluded in both intervention and control study with no intention to treat analysis been  
24  
25 stated in the study (see Supplementary file 3, Figure 2b). We encountered low study samples  
26  
27 in all trials. Therefore, the overall level of evidence contributing to outcomes of this review is  
28  
29 low to moderate as assessed using the GRADE approach (Refer Table 2).  
30  
31  
32  
33  
34  
35  
36  
37  
38  
39  
40  
41  
42  
43  
44  
45  
46  
47  
48  
49  
50  
51  
52  
53  
54  
55  
56  
57  
58  
59  
60

Table 2: The GRADE quality assessment for CoQ10

**Summary of findings:****Coenzyme Q10 compared to control for migraine prophylaxis****Patient or population:** Adults patient with migraine**Setting:** Health care centres**Intervention:** Coenzyme Q10**Comparison:** Placebo

| Outcomes                                                    | Anticipated absolute effects* (95% CI)                  |                                                     | Relative effect (95% CI) | No of participants (studies) | Certainty of the evidence (GRADE) |
|-------------------------------------------------------------|---------------------------------------------------------|-----------------------------------------------------|--------------------------|------------------------------|-----------------------------------|
|                                                             | Risk with control                                       | Risk with Coenzyme Q10                              |                          |                              |                                   |
| Severity of headache during attack follow up: 6 weeks       | The mean severity of headache during attack was 0       | MD <b>1.33 lower</b><br>(2.97 lower to 0.31 higher) | -                        | 371<br>(6 RCTs)              | ⊕⊕○○<br>LOW <sup>a</sup>          |
| Duration of headache attacks follow up: 6 weeks             | The mean duration of headache attacks was 0             | MD <b>0.19 lower</b><br>(0.27 lower to 0.11 lower)  | -                        | 371<br>(6 RCTs)              | ⊕⊕⊕○<br>MODERATE <sup>b</sup>     |
| Frequency of migraine headache per month follow up: 6 weeks | The mean frequency of migraine headache per month was 0 | MD <b>1.52 lower</b><br>(2.4 lower to 0.65 lower)   | -                        | 259<br>(5 RCTs)              | ⊕⊕⊕○<br>MODERATE <sup>b</sup>     |

\*The risk in the intervention group (and its 95% confidence interval) is based on the assumed risk in the comparison group and the relative effect of the intervention (and its 95% CI).

CI: Confidence interval; MD: Mean difference; OR: Odds ratio

**GRADE Working Group grades of evidence**

**High certainty:** We are very confident that the true effect lies close to that of the estimate of the effect

**Moderate certainty:** We are moderately confident in the effect estimate: The true effect is likely to be close to the estimate of the effect, but there is a possibility that it is substantially different

**Low certainty:** Our confidence in the effect estimate is limited: The true effect may be substantially different from the estimate of the effect

**Very low certainty:** We have very little confidence in the effect estimate: The true effect is likely to be substantially different from the estimate of effect

<sup>a</sup> There is presence of the statistical heterogeneity, inconsistency and imprecision existed.

<sup>b</sup> Downgraded due to large confidence intervals from small sample size and small number of included studies.

### Potential biases in the review process

We attempted to reduce publication bias by checking the reference lists of all related studies for further references and searching multiple databases. We have checked the protocols, the consistency between objectives, methodology and results of each trials to reduce the publication bias. There were six included studies, and we were not able to construct a funnel plot for detecting publication bias. Not all included studies reported all outcomes. We did not perform the meta regression analysis to analyse publication bias in this meta-analysis. Although the included studies all showed the same direction of effect, we encountered low to high heterogeneity in our primary outcomes. The high heterogeneity was not able to be explained through the subgroup analysis.

### Agreements and disagreements with other studies or reviews

There were another two systematic reviews and meta-analyses published in year 2019 done by Okoli *et al* and Parohan *et al*(30, 31). Okoli *et al* evaluated the efficacy of all types of vitamins including CoQ10 as migraine prophylaxis(30). Three out of 18 trials included in the review evaluated CoQ10(23, 26, 32). They found no reduction in frequency, duration and severity of migraine with CoQ10. Parohan *et al*(31) performed the meta-analysis regarding the effects of CoQ10 supplementation on clinical features of migraine and the study included four trials(22, 26, 33, 34) in which, two of the trials were included in our meta-analysis(22, 26). We removed the remaining two trials because the study methods not match to our reviewed(33, 34). They reported that CoQ10 reduced the frequency migraine attack but no significant effect on severity and duration of migraine attacks. We found no other systematic reviews that reported on our other pre specified secondary outcomes.



1  
2  
3 For future research, we recommended that the quality of life with validated measurement tool  
4 should be used. Data on side effects of coenzyme Q10 are limited thus, need to be explored  
5  
6 further. New studies should be performed on bigger samples.  
7  
8  
9

## 10 **Conclusion**

11  
12  
13  
14 CoQ10 might have beneficial effect on reduction of the headache duration during attack and  
15 the frequency of migraine attack. The total number of trials on coenzyme Q10 supplementation  
16 for migraine prophylaxis is still limited. Due to the small number of trials contributing to the  
17 analyses and small effect sizes, the results presented should be considered with caution, thus  
18 further bigger sample size and high-quality trials are needed to determine the beneficial effects  
19 of the coenzyme Q10 in migraine.  
20  
21  
22  
23  
24  
25  
26  
27  
28  
29  
30  
31  
32  
33  
34  
35  
36  
37  
38  
39  
40  
41  
42  
43  
44  
45  
46  
47  
48  
49  
50  
51  
52  
53  
54  
55  
56  
57  
58  
59  
60

## **CONTRIBUTION OF AUTHORS**

SB was involved in designing the review, writing the protocol, reviewed the articles to decide for inclusion, carried out data extraction, assessed the quality of articles, giving input in interpreting results from data analysis and gave input for writing the discussion.

SS was involved in preparing the protocol, writing the protocol, searching literatures and reviewed articles to decide for inclusion, carried out data extraction, entering data and carried out data analysis, assessing the quality of articles and writing the discussion of review results.

NMN was involved in co-ordinating the flow of the review process, reviewing literatures and articles to decide for inclusion, and assisting results interpretation from data analysis, assessing the quality of articles and gave input for writing results of review and discussion.

NSI was involved in co-ordinating the flow of the review process, gave input in designing the review, carried out data extraction and gave input for writing the discussion.

## **FUNDING**

None.

## **PATIENT AND PUBLIC INVOLVEMENT**

No patient or public involvement in this meta-analysis.

## **COMPETING INTERESTS**

None declared.

## **DATA SHARING**

No additional data available.

## REFERENCES

1. Lipton RB, Stewart WF, Diamond S, Diamond ML, Reed M. Prevalence and burden of migraine in the United States: data from the American Migraine Study II. *Headache*. 2001;41(7):646-57.
2. Steiner TJ, Stovner LJ, Vos T, Jensen R, Katsarava Z. Migraine is first cause of disability in under 50s: will health politicians now take notice? *The journal of headache and pain*. 2018;19(1):17-.
3. Hershey AD, Powers SW, Vockell AL, Lecates SL, Ellinor PL, Segers A, et al. Coenzyme Q10 deficiency and response to supplementation in pediatric and adolescent migraine. *Headache*. 2007;47(1):73-80.
4. Ashina M, Tvedskov JF, Lipka K, Bilello J, Penkowa M, Olesen J. Matrix metalloproteinases during and outside of migraine attacks without aura. *Cephalalgia : an international journal of headache*. 2010;30(3):303-10.
5. Gursoy-Ozdemir Y, Qiu J, Matsuoka N, Bolay H, Bempohl D, Jin H, et al. Cortical spreading depression activates and upregulates MMP-9. *The Journal of clinical investigation*. 2004;113(10):1447-55.
6. Sanoobar M, Eghtesadi S, Azimi A, Khalili M, Khodadadi B, Jazayeri S, et al. Coenzyme Q10 supplementation ameliorates inflammatory markers in patients with multiple sclerosis: a double blind, placebo, controlled randomized clinical trial. *Nutritional neuroscience*. 2015;18(4):169-76.
7. Hagen K, Brenner E, Linde M, Gravdahl GB, Tronvik EA, Engstrom M, et al. Acetyl-L-carnitine versus placebo for migraine prophylaxis: A randomized, triple-blind, crossover study. *Cephalalgia : an international journal of headache*. 2015;35(11):987-95.
8. Bhagavan HN, Chopra RK. Coenzyme Q10: absorption, tissue uptake, metabolism and pharmacokinetics. *Free radical research*. 2006;40(5):445-53.
9. Higgins JPT TJ, Chandler J, Cumpston M, Li T, Page MJ, Welch VA. *Cochrane Handbook for Systematic Reviews of Interventions version 6.0 (updated July 2019)*: Cochrane; 2019. Available from: Available from [www.training.cochrane.org/handbook](http://www.training.cochrane.org/handbook).
10. Guyatt GH, Oxman AD, Kunz R, Vist GE, Falck-Ytter Y, Schunemann HJ. What is "quality of evidence" and why is it important to clinicians? *BMJ (Clinical research ed)*. 2008;336(7651):995-8.
11. The Nordic Cochrane Centre TCC. *Review Manager (RevMan)*. Version 5.3.: Copenhagen: The Nordic Cochrane Centre, The Cochrane Collaboration; 2014.
12. Airola G, Allais G, Castagnoli Gabellari I, Rolando S, Mana O, Benedetto C. Non-pharmacological management of migraine during pregnancy. *Neurological sciences : official journal of the Italian Neurological Society and of the Italian Society of Clinical Neurophysiology*. 2010;31 Suppl 1:S63-5.
13. Bianchi A, Salomone S, Caraci F, Pizza V, Bernardini R, D'Amato CC. Role of magnesium, coenzyme Q10, riboflavin, and vitamin B12 in migraine prophylaxis. *Vitamins and hormones*. 2004;69:297-312.
14. Carotenuto M, Esposito M. Nutraceuticals safety and efficacy in migraine without aura in a population of children affected by neurofibromatosis type I. *Neurological sciences : official journal of the Italian Neurological Society and of the Italian Society of Clinical Neurophysiology*. 2013;34(11):1905-9.
15. Dalla Volta G, Carli D, Zavarise P, Ngonga G, Vollaro S. P026. Pilot study on the use of coenzyme Q10 in a group of patients with episodic migraine without aura. *Journal of headache and pain ( varpagings)*. 2015;16(no pagination).
16. Daniel O, Mauskop A. Nutraceuticals in Acute and Prophylactic Treatment of Migraine. *Current treatment options in neurology*. 2016;18(4):14.
17. Di Lorenzo C. The use of a phytotherapeutic compound containing Tanacetum Parthenium and Andrographis, in combination with CoQ10 and Riboflavin, for migraine prophylaxis: a randomized double blind versus placebo clinical trial. *Journal of headache and pain Conference: 12th european*

- 1  
2  
3 headache federation congress and the 32nd national congress of the italian society for the study of  
4 headaches Italy. 2018;19.
- 5 18. Esposito M, Carotenuto M. Ginkgolide B complex efficacy for brief prophylaxis of migraine in  
6 school-aged children: an open-label study. *Neurological sciences : official journal of the Italian*  
7 *Neurological Society and of the Italian Society of Clinical Neurophysiology*. 2011;32(1):79-81.
- 8 19. Gaul C, Danesch U, Diener H. A proprietary supplement containing riboflavin, magnesium  
9 and Q10 improves migraine symptoms in a randomized placebo-controlled double-blind trial.  
10 *Cephalalgia : an international journal of headache*. 2015;35(6 SUPPL. 1):45.
- 11 20. Rozen TD, Oshinsky ML, Gebeline CA, Bradley KC, Young WB, Shechter AL, et al. Open label  
12 trial of coenzyme Q10 as a migraine preventive. *Cephalalgia*. 2002;22(2):137-41.
- 13 21. Dahri M, Hashemilar M, Asghari-Jafarabadi M, Tarighat-Esfanjan A. Efficacy of coenzyme  
14 Q10 for the prevention of migraine in women: a randomized, double-blind, placebo-controlled  
15 study. *European Journal Of Integrative Medicine*. 2017;16:8-14.
- 16 22. Dahri M, Tarighat-Esfanjan A, Asghari-Jafarabadi M, Hashemilar M. Oral coenzyme Q10  
17 supplementation in patients with migraine: effects on clinical features and inflammatory markers.  
18 *Nutritional Neuroscience*. 2018:1-9.
- 19 23. Gaul C, Diener HC, Danesch U. Improvement of migraine symptoms with a proprietary  
20 supplement containing riboflavin, magnesium and Q10: a randomized, placebo-controlled, double-  
21 blind, multicenter trial. *Journal Of Headache And Pain*. 2015;16:516.
- 22 24. Hajhashemi P, Askari G, Khorvash F, Reza Maracy M, Nourian M. The effects of concurrent  
23 Coenzyme Q10, L-carnitine supplementation in migraine prophylaxis: A randomized, placebo-  
24 controlled, double-blind trial. *Cephalalgia*. 2019:333102418821661.
- 25 25. Nattagh-Eshivani E, Dahri M, Hashemilar M, Tarighat-Esfanjan A. The effect of Coenzyme  
26 Q10 supplementation on serum levels of lactate, pyruvate, matrix metalloproteinase 9 and nitric  
27 oxide in women with migraine. A double blind, placebo, controlled randomized clinical trial.  
28 *European Journal Of Integrative Medicine*. 2018;21:70-6.
- 29 26. Sandor PS, Di Clemente L, Coppola G, Saenger U, Fumal A, Magis D, et al. Efficacy of  
30 coenzyme Q10 in migraine prophylaxis: a randomized controlled trial. *Neurology*. 2005;64(4):713-5.
- 31 27. Lipton RB, Bigal ME, Diamond M, Freitag F, Reed ML, Stewart WF. Migraine prevalence,  
32 disease burden, and the need for preventive therapy. *Neurology*. 2007;68(5):343-9.
- 33 28. Manzoni GC, Torelli P. Epidemiology of migraine. *The Journal of Headache and Pain*.  
34 2003;4(Suppl 1):s18-s22.
- 35 29. Talebian A, Soltani B, Banafshe HR, Moosavi GA, Talebian M, Soltani S. Prophylactic effect of  
36 riboflavin on pediatric migraine: a randomized, double-blind, placebo-controlled trial. *Electron*  
37 *Physician*. 2018;10(2):6279-85.
- 38 30. Okoli GN, Rabbani R, Kashani HH, Wierzbowski AK, Neilson C, Mansouri B, et al. Vitamins and  
39 Minerals for Migraine Prophylaxis: A Systematic Review and Meta-analysis. *Can J Neurol Sci*.  
40 2019;46(2):224-33.
- 41 31. Parohan M, Sarraf P, Javanbakht MH, Ranji-Burachaloo S, Djalali M. Effect of coenzyme Q10  
42 supplementation on clinical features of migraine: a systematic review and dose-response meta-  
43 analysis of randomized controlled trials. *Nutr Neurosci*. 2019:1-8.
- 44 32. Khorvash F, Bagheri L, Ghasemi M, Ghaed-Amini A, Maracy MR. Coenzyme q10 in migraine  
45 prophylaxis: a randomized, double-blind, placebo-controlled clinical trial. *Journal of isfahan medical*  
46 *school*. 2016;33(358):1904-11.
- 47 33. Slater SK, Nelson TD, Kabbouche MA, LeCates SL, Horn P, Segers A, et al. A randomized,  
48 double-blinded, placebo-controlled, crossover, add-on study of CoEnzyme Q10 in the prevention of  
49 pediatric and adolescent migraine. *Cephalalgia*. 2011;31(8):897-905.
- 50 34. Shoeibi A, Olfati N, Soltani Sabi M, Salehi M, Mali S, Akbari Oryani M. Effectiveness of  
51 coenzyme Q10 in prophylactic treatment of migraine headache: an open-label, add-on, controlled  
52 trial. *Acta Neurologica Belgica*. 2017;117(1):103-9.
- 53  
54  
55  
56  
57  
58  
59  
60

1  
2  
3 **Supplementary file 1: DETAILED SEARCH STRATEGY**  
4  
5  
6  
7

8 **MEDLINE search strategy**  
9

10 Pubmed - (migraine[Title/Abstract]) AND coenzyme q10[Title/Abstract]  
11  
12

13 MeSH data based"coenzyme Q10"[All Fields] OR coenzyme q10[Text Word]  
14  
15

16 migraine[Title/Abstract] AND q10[Title/Abstract]  
17  
18

19 migraine[Title/Abstract] AND ubiquinone[Title/Abstract]  
20  
21  
22  
23  
24

25 **CENTRAL search strategy**  
26  
27

28 migraine in Title Abstract Keyword AND coenzyme q10 in Title Abstract Keyword  
29  
30

31 migraine in Title Abstract Keyword AND ubiquinone in Title Abstract Keyword  
32  
33

34 migraine in Title Abstract Keyword AND q10 in Title Abstract Keyword  
35  
36

37 MeSH data based"coenzyme Q10"[All Fields] OR coenzyme q10[Text Word]  
38  
39  
40  
41  
42  
43  
44  
45  
46  
47  
48  
49  
50  
51  
52  
53  
54  
55  
56  
57  
58  
59  
60

## Supplementary file 2: PRISMA FLOWCHART



Figure 1: PRISMA Study flow diagram

Supplementary file 3: RISK OF BIAS ASSESSMENT



Figure 2a: Risk of bias graph: review authors' judgements about each risk of bias item presented as percentages across all included studies.

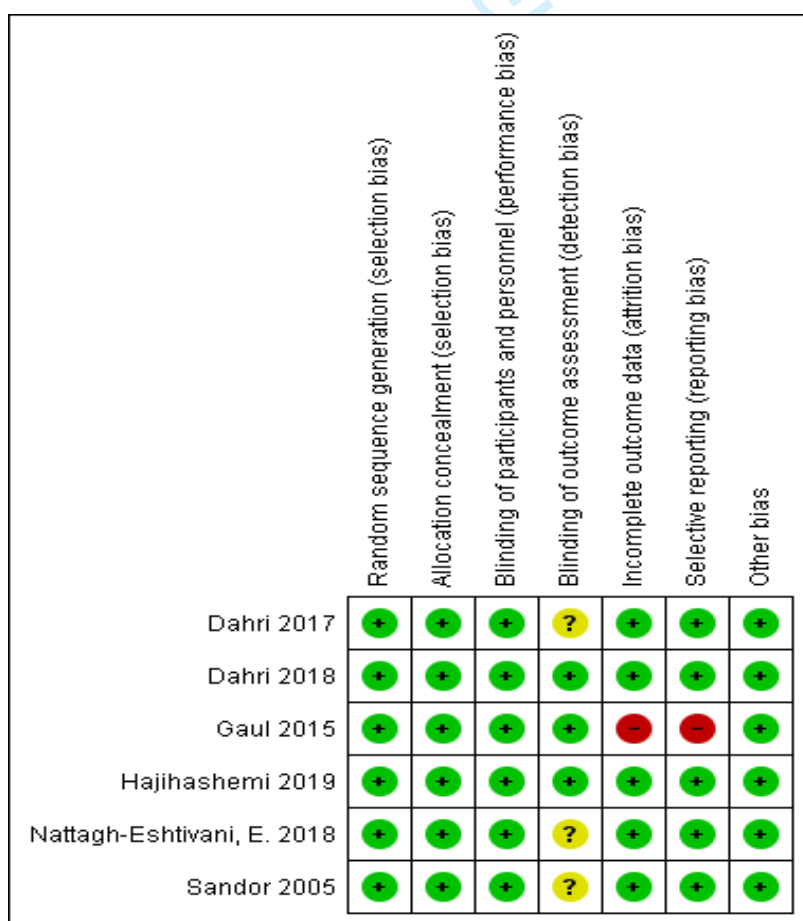

Figure 2b: Risk of bias summary: review authors' judgements about each risk of bias item for each included study.

## Supplementary file 4: FOREST PLOT OF PRIMARY OUTCOMES



**Figure 3:** Forest plot of effects coenzyme Q10 versus control on severity of headache during attack



**Figure 4:** Forest plot of effects coenzyme Q10 versus control on duration of headache attacks per month





**Figure 5:** Forest plot of effects coenzyme Q10 versus control on frequency of migraine headache per month

For peer review only

## Appendix I: PRISMA Checklist

| Section/topic                      | #  | Checklist item                                                                                                                                                                                                                                                                                              | Reported on page # of manuscript file (unless otherwise indicated) |
|------------------------------------|----|-------------------------------------------------------------------------------------------------------------------------------------------------------------------------------------------------------------------------------------------------------------------------------------------------------------|--------------------------------------------------------------------|
| <b>TITLE</b>                       |    |                                                                                                                                                                                                                                                                                                             |                                                                    |
| Title                              | 1  | Identify the report as a systematic review, meta-analysis, or both.                                                                                                                                                                                                                                         | 1                                                                  |
| <b>ABSTRACT</b>                    |    |                                                                                                                                                                                                                                                                                                             |                                                                    |
| Structured summary                 | 2  | Provide a structured summary including, as applicable: background; objectives; data sources; study eligibility criteria, participants, and interventions; study appraisal and synthesis methods; results; limitations; conclusions and implications of key findings; systematic review registration number. | 3                                                                  |
| <b>INTRODUCTION</b>                |    |                                                                                                                                                                                                                                                                                                             |                                                                    |
| Rationale                          | 3  | Describe the rationale for the review in the context of what is already known.                                                                                                                                                                                                                              | 6                                                                  |
| Objectives                         | 4  | Provide an explicit statement of questions being addressed with reference to participants, interventions, comparisons, outcomes, and study design (PICOS).                                                                                                                                                  | 6                                                                  |
| <b>METHODS</b>                     |    |                                                                                                                                                                                                                                                                                                             |                                                                    |
| Protocol and registration          | 5  | Indicate if a review protocol exists, if and where it can be accessed (e.g., Web address), and, if available, provide registration information including registration number.                                                                                                                               | 6                                                                  |
| Eligibility criteria               | 6  | Specify study characteristics (e.g., PICOS, length of follow-up) and report characteristics (e.g., years considered, language, publication status) used as criteria for eligibility, giving rationale.                                                                                                      | 7                                                                  |
| Information sources                | 7  | Describe all information sources (e.g., databases with dates of coverage, contact with study authors to identify additional studies) in the search and date last searched.                                                                                                                                  | 7                                                                  |
| Search                             | 8  | Present full electronic search strategy for at least one database, including any limits used, such that it could be repeated.                                                                                                                                                                               | 7, Supplementary file 1                                            |
| Study selection                    | 9  | State the process for selecting studies (i.e., screening, eligibility, included in systematic review, and, if applicable, included in the meta-analysis).                                                                                                                                                   | 7-8, Supplementary file 2: Figure1                                 |
| Data collection process            | 10 | Describe method of data extraction from reports (e.g., piloted forms, independently, in duplicate) and any processes for obtaining and confirming data from investigators.                                                                                                                                  | 8                                                                  |
| Data items                         | 11 | List and define all variables for which data were sought (e.g., PICOS, funding sources) and any assumptions and simplifications made.                                                                                                                                                                       | 8-9                                                                |
| Risk of bias in individual studies | 12 | Describe methods used for assessing risk of bias of individual studies (including specification of whether this was done at the study or outcome level), and how this information is to be used in any data synthesis.                                                                                      | 8                                                                  |
| Summary measures                   | 13 | State the principal summary measures (e.g., risk ratio, difference in means).                                                                                                                                                                                                                               | 8-9                                                                |

| Section/topic                 | #  | Checklist item                                                                                                                                                                                           | Reported on page # of manuscript file (unless otherwise indicated) |
|-------------------------------|----|----------------------------------------------------------------------------------------------------------------------------------------------------------------------------------------------------------|--------------------------------------------------------------------|
| Synthesis of results          | 14 | Describe the methods of handling data and combining results of studies, if done, including measures of consistency (e.g., I <sup>2</sup> ) for each meta-analysis.                                       | 8-9                                                                |
| Risk of bias across studies   | 15 | Specify any assessment of risk of bias that may affect the cumulative evidence (e.g., publication bias, selective reporting within studies).                                                             | 8                                                                  |
| Additional analyses           | 16 | Describe methods of additional analyses (e.g., sensitivity or subgroup analyses, meta-regression), if done, indicating which were pre-specified.                                                         | 9                                                                  |
| <b>RESULTS</b>                |    |                                                                                                                                                                                                          |                                                                    |
| Study selection               | 17 | Give numbers of studies screened, assessed for eligibility, and included in the review, with reasons for exclusions at each stage, ideally with a flow diagram.                                          | 9, Supplementary file 2 (figure 1)                                 |
| Study characteristics         | 18 | For each study, present characteristics for which data were extracted (e.g., study size, PICOS, follow-up period) and provide the citations.                                                             | 10, Table 1                                                        |
| Risk of bias within studies   | 19 | Present data on risk of bias of each study and, if available, any outcome level assessment (see item 12).                                                                                                | 12, Supplementary file 3 (figure 2a,2b)                            |
| Results of individual studies | 20 | For all outcomes considered (benefits or harms), present, for each study: (a) simple summary data for each intervention group (b) effect estimates and confidence intervals, ideally with a forest plot. | 12-13, Supplementary file 4 (figure 4, 5,6)                        |
| Synthesis of results          | 21 | Present results of each meta-analysis done, including confidence intervals and measures of consistency.                                                                                                  | 13-14                                                              |
| Risk of bias across studies   | 22 | Present results of any assessment of risk of bias across studies (see Item 15).                                                                                                                          | 12-13, Supplementary file 3 (figure 2a,2b)                         |
| Additional analysis           | 23 | Give results of additional analyses, if done (e.g., sensitivity or subgroup analyses, meta-regression [see Item 16]).                                                                                    | 13-14                                                              |
| <b>DISCUSSION</b>             |    |                                                                                                                                                                                                          |                                                                    |
| Summary of evidence           | 24 | Summarize the main findings including the strength of evidence for each main outcome; consider their relevance to key groups (e.g., healthcare providers, users, and policy makers).                     | 15-17, Table 2                                                     |
| Limitations                   | 25 | Discuss limitations at study and outcome level (e.g., risk of bias), and at review-level (e.g., incomplete retrieval of identified research, reporting bias).                                            | 16                                                                 |
| Conclusions                   | 26 | Provide a general interpretation of the results in the context of other evidence, and implications for future research.                                                                                  | 18-19                                                              |
| <b>FUNDING</b>                |    |                                                                                                                                                                                                          |                                                                    |
| Funding                       | 27 | Describe sources of funding for the systematic review and other support (e.g., supply of data); role of funders for the systematic review.                                                               | 20                                                                 |
