# Supplementary material for: Coenzyme Q10 supplementation for prophylaxis in adult patients with migraine—a meta-analysis
Source: PubMed Central journal article supplement — BMJ Open. 2021 Jan 5;11(1):e039358. doi: 10.1136/bmjopen-2020-039358 (PMC7786797; doi:10.1136/bmjopen-2020-039358), 2021-01-05
Supplement: bmjopen-2020-039358supp001.pdf [file bmjopen-2020-039358supp001.pdf]

## DETAILED SEARCH STRATEGY

### MEDLINE search strategy

Pubmed - (migraine[Title/Abstract]) AND coenzyme q10[Title/Abstract]

MeSH data based"coenzyme Q10"[All Fields] OR coenzyme q10[Text Word]

migraine[Title/Abstract] AND q10[Title/Abstract] migraine[Title/Abstract]

AND ubiquinone[Title/Abstract]

**CENTRAL search strategy** migraine in Title Abstract Keyword AND coenzyme

q10 in Title Abstract Keyword migraine in Title Abstract Keyword AND

ubiquinone in Title Abstract Keyword migraine in Title Abstract Keyword AND

q10 in Title Abstract Keyword

MeSH data based"coenzyme Q10"[All Fields] OR coenzyme q10[Text Word] **PRISMA FLOWCHART**
