# Supplementary material for: Coenzyme Q10 supplementation for prophylaxis in adult patients with migraine—a meta-analysis
Source: PubMed Central journal article supplement — BMJ Open. 2021 Jan 5;11(1):e039358. doi: 10.1136/bmjopen-2020-039358 (PMC7786797; doi:10.1136/bmjopen-2020-039358), 2021-01-05
Supplement: bmjopen-2020-039358supp003.pdf [file bmjopen-2020-039358supp003.pdf]

## Supplementary file 3

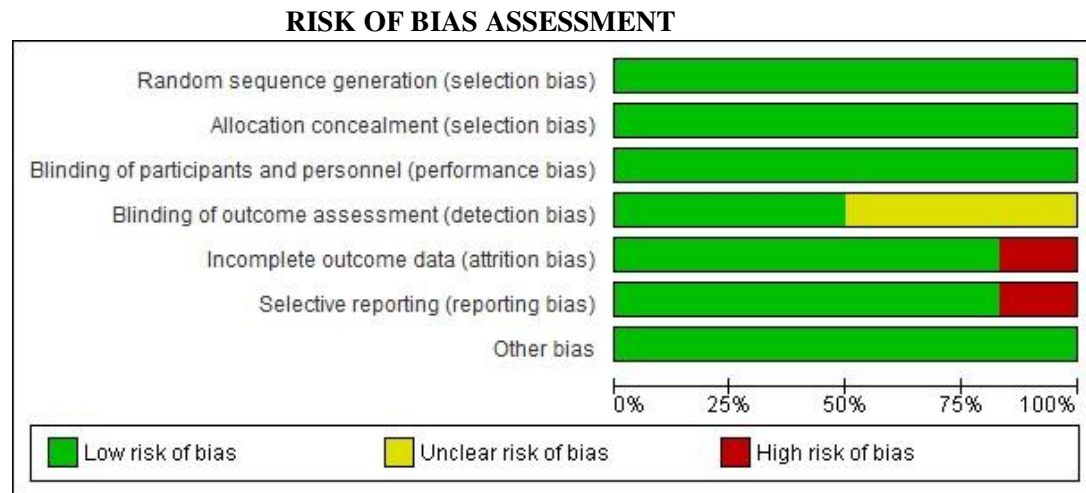

**Figure 2a:** Risk of bias graph: review authors' judgements about each risk of bias item presented as percentages across all included studies.

|                            | Random sequence generation (selection bias) | Allocation concealment (selection bias) | Blinding of participants and personnel (performance bias) | Blinding of outcome assessment (detection bias) | Incomplete outcome data (attrition bias) | Selective reporting (reporting bias) | Other bias |
|----------------------------|---------------------------------------------|-----------------------------------------|-----------------------------------------------------------|-------------------------------------------------|------------------------------------------|--------------------------------------|------------|
| Dahri 2017                 | +                                           | +                                       | +                                                         | ?                                               | +                                        | +                                    | +          |
| Dahri 2018                 | +                                           | +                                       | +                                                         | +                                               | +                                        | +                                    | +          |
| Gaul 2015                  | +                                           | +                                       | +                                                         | +                                               | ●                                        | ●                                    | +          |
| Hajihashemi 2019           | +                                           | +                                       | +                                                         | +                                               | +                                        | +                                    | +          |
| Nattagh-Eshtivani, E. 2018 | +                                           | +                                       | +                                                         | ?                                               | +                                        | +                                    | +          |
| Sandor 2005                | +                                           | +                                       | +                                                         | ?                                               | +                                        | +                                    | +          |

**Figure 2b:** Risk of bias summary: review authors' judgements about each risk of bias item for each included study.
