# Supplementary material for: Coenzyme Q10 supplementation for prophylaxis in adult patients with migraine—a meta-analysis
Source: PubMed Central journal article supplement — BMJ Open. 2021 Jan 5;11(1):e039358. doi: 10.1136/bmjopen-2020-039358 (PMC7786797; doi:10.1136/bmjopen-2020-039358), 2021-01-05
Supplement: bmjopen-2020-039358supp004.pdf [file bmjopen-2020-039358supp004.pdf]

## Supplementary file 4: FOREST PLOT OF PRIMARY OUTCOMES

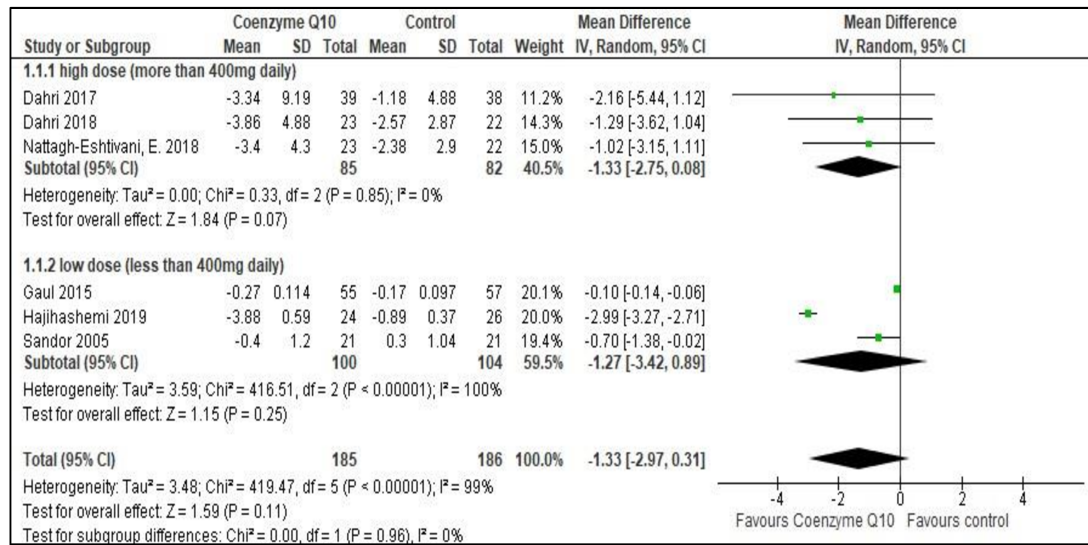

**Figure 3:** Forest plot of effects coenzyme Q10 versus control on severity of headache during attack

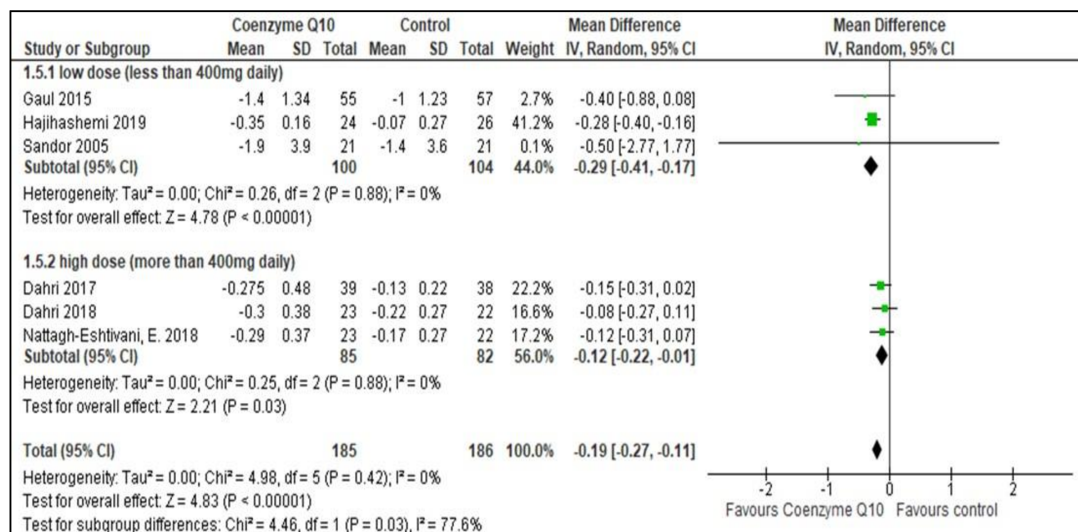

**Figure 4:** Forest plot of effects coenzyme Q10 versus control on duration of headache attacks per month

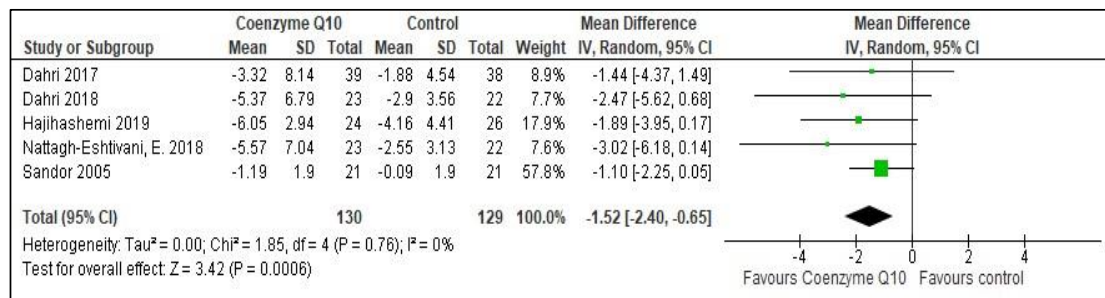

**Figure 5:** Forest plot of effects coenzyme Q10 versus control on frequency of migraine headache per month
