# Supplementary figures and images for: Coenzyme Q10 supplementation for prophylaxis in adult patients with migraine—a meta-analysis
Source: PubMed Central journal article supplement — BMJ Open. 2021 Jan 5;11(1):e039358. doi: 10.1136/bmjopen-2020-039358 (PMC7786797; doi:10.1136/bmjopen-2020-039358), 2021-01-05

## Supplementary file 2

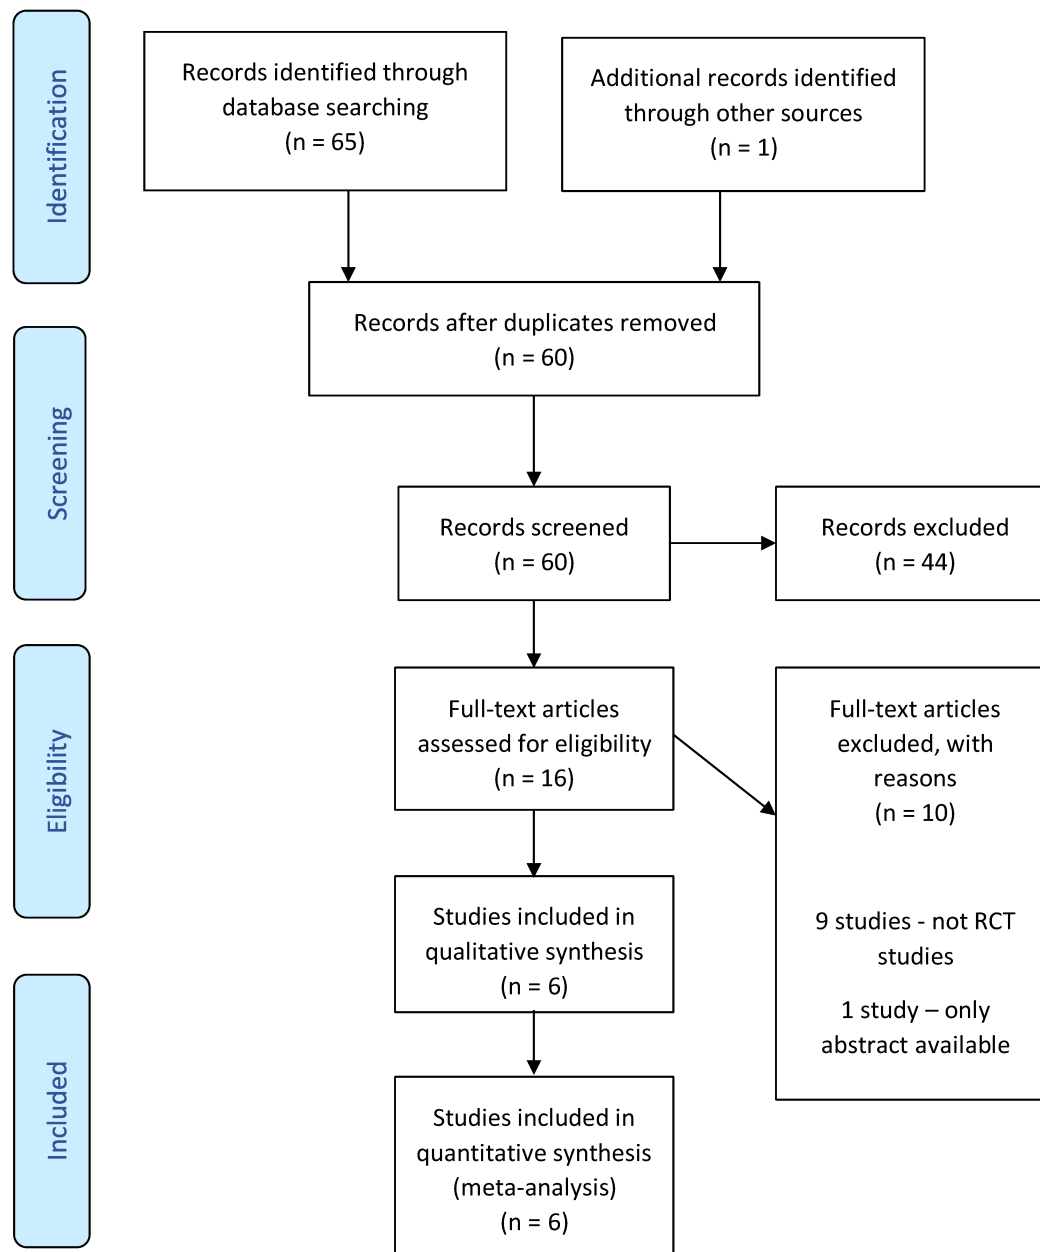

Figure 1: PRISMA Study flow diagram

Supplement: bmjopen-2020-039358supp002.pdf [file bmjopen-2020-039358supp002.pdf]
